# Supplementary material for: High-resolution DNA methylation screening of the major histocompatibility complex in multiple sclerosis
Source: Front Neurol. 2023 Dec 8;14:1326738. doi: 10.3389/fneur.2023.1326738 (PMC10739394; doi:10.3389/fneur.2023.1326738)
Supplement: Supplementary file 3 [file Table_2.XLSX]

## Sheet: Sheet1
Variant	Position (hg38)	A1	A2	OR	P-value	BIC	Locus
rs1071743 G	29943279	P	A	0.69	1.05e-280	138916	A
rs3819292	31354745	A	C	1.09	3.19e-10	135007	B
HLA-B*38:01	31355516	P	A	0.48	2.97e-54	136853	B
HLA-B*52:01	31355516	P	A	0.44	2.01e-25	135392	B
HLA-B*35:03	31355516	P	A	1.33	7.73e-13	135123	B
rs4081559	31355900	T	C	1.31	4.69e-82	136496	B
AA B position 45 TK	31356825	P	A	1.13	1.82e-29	136035	B
rs9266629	31379045	C	T	0.82	8.88e-57	137082	intergenic (ZDHHC20P2/FGFR3P1)
rs3093982	31529467	T	C	1.11	4.95e-08	134935	MCCD1
rs2523500	31550577	C	T	0.92	6.06e-13	135300	NFKBIL1
rs2844482	31571990	A	G	1.35	7.13e-124	137322	LST1 (class III haplotype)
rs2229092	31572980	C	A	1.17	3.45e-10	135035	LTA
rs17493811	32177622	G	C	0.82	8.98e-11	134977	AGPAT1
rs67476479 CA	32584171	P	A	1.32	4.49e-105	137871	DRB1
HLA-DRB1*15:01	32584287	P	A	2.9	1.62E-1916	140186	DRB1
HLA-DRB1*13:03	32584287	P	A	1.79	1.71e-42	136321	DRB1
HLA-DRB1*01:03	32584287	P	A	1.6	2.6e-20	135545	DRB1
HLA-DRB1*04:11	32584287	P	A	2.63	2.89e-09	134953	DRB1
rs766848979 A	32584361	P	A	0.84	6.35e-12	135162	DRB1
rs9271366	32619077	G	A	1.57	1.34e-16	135489	intergenic (DRB1/DQA1)
HLA-DQA1*06	32640529	P	A	1.85	1.77e-10	135063	DQA1
rs10093	32641396	G	C	0.88	1.97e-16	135198	DQA1
AA DQ_1 position 130 S	32642098	P	A	1.48	6.18e-29	135810	DQA1
AA DQ_1 position 221 Q	32661361	P	A	0.68	1.76e-79	134617	DQB1
rs1049079 C	32665018	P	A	0.88	2.99e-14	135254	DQB1
AA DQ_1 position -5 L	32666525	P	A	1.24	6.19e-29	135922	DQB1
rs7454108	32713706	C	T	1.25	1.7e-41	136151	intergenic (HLA-DQA2/MTCO3P1)
rs3135024	33079689	C	T	1.16	1.82e-15	135340	DPA1/DPB1
rs3097671	33079835	C	G	1.34	2.19e-131	138333	DPB1
rs11751659	33113855	G	A	1.17	5.75e-28	135701	DPB2
rs9277626	33114046	G	A	0.92	7.16e-11	135092	DPB2
