# Supplementary material for: High-resolution DNA methylation screening of the major histocompatibility complex in multiple sclerosis
Source: Front Neurol. 2023 Dec 8;14:1326738. doi: 10.3389/fneur.2023.1326738 (PMC10739394; doi:10.3389/fneur.2023.1326738)
Supplement: Supplementary file 5 [file Table_4.XLSX]

## Sheet: Sheet1
DMRs	HLA-A_1	HLA-A_2	HLA-B_1	HLA-B_2	HLA-C_1	HLA-C_2	DPA1_1	DPA1_2	HLA-DPB1_1	HLA-DPB1_2	HLA-DQA1_1	HLA-DQA1_2	HLA-DQB1_1	HLA-DQB1_2	HLA-DRB1_1	HLA-DRB1_2	HLA-DRB3/4/5_1	HLA-DRB3/4/5_2
chr6:29015191-29015200	0.225823	0.388278	0.900901	0.039445	0.975977	0.351333	0.727037	0.715006	0.871892	0.811339	0.0954426	0.552214	0.217929	0.35366	0.815874	0.314912	0.896496	0.122258
chr6:32583759-32583973	0.0649272	0.324616	3.78055e-05	0.00715492	0.318929	0.0255725	0.267123	0.0503932	0.110574	0.0128983	2.8868e-19	1.26253e-10	2.11182e-07	2.3479e-40	4.02348e-12	3.1458e-24	1.13797e-14	4.8248e-39
chr6:32584090-32584819	0.207166	0.512841	2.71386e-06	0.0565603	0.0475471	0.00265191	0.0308193	0.0545935	0.0701276	0.0611121	6.71416e-25	5.87114e-07	4.72382e-09	9.11929e-48	2.90384e-12	1.23367e-34	1.7004e-19	1.13586e-61
chr6:29871707-29871771	1.11798e-21	1.25938e-21	0.227402	0.612546	0.0530309	0.0414758	0.474188	0.16016	0.638521	0.325413	0.294647	0.766886	0.21365	0.600464	0.7138	0.366977	0.682793	0.598592
chr6:29881702-29881730	1.67814e-20	9.87449e-22	0.310957	0.0190097	0.0111315	0.13589	0.857582	0.0499484	0.234795	0.345151	0.263526	0.568648	0.21351	0.435378	0.709578	0.287279	0.881119	0.810775
chr6:29896409-29896721	6.64963e-24	2.61221e-22	0.180066	0.256678	0.0994657	0.0781398	0.123776	0.251707	0.0457876	0.140789	0.0298159	0.846368	0.193375	0.115676	0.41242	0.633383	0.94041	0.390094
chr6:29936190-29936634	2.32345e-27	2.81974e-20	0.189257	0.464236	0.765507	0.0192989	0.482467	0.882187	0.29186	0.0720689	0.0714738	0.854306	0.59566	0.0855305	0.795239	0.70369	0.504939	0.905879
chr6:29939671-29939978	2.06253e-33	9.90632e-18	0.0293938	0.160992	0.38814	0.000274711	0.0793409	0.752563	0.316964	0.0671531	0.577654	0.583655	0.421496	0.0815915	0.69382	0.469348	0.371609	0.692978
chr6:29940402-29940532	5.69708e-34	1.5184e-22	0.00374931	0.347462	0.00404878	0.007115	0.68625	0.540184	0.16153	0.0416943	0.223734	0.601437	0.0268991	0.0805266	0.0788074	0.246665	0.280308	0.466714
chr6:30220380-30220423	1.99592e-06	7.10579e-12	0.00183353	0.102989	0.0991961	0.016766	0.26473	0.682516	0.362162	0.779189	0.797789	0.974173	0.0195379	0.231964	0.120412	0.738908	0.0815296	0.537508
chr6:30240007-30240096	5.53415e-10	1.70749e-10	2.23825e-05	0.25296	0.00633054	0.00508896	0.0513881	0.531974	0.0524819	0.475048	0.353122	0.51346	0.000102782	0.0216831	0.0675701	0.288831	0.0442758	0.866964
chr6:30246147-30246369	3.11693e-06	1.17445e-13	0.0338997	0.034526	0.231194	0.0186767	0.190488	0.156854	0.224816	0.691406	0.835721	0.783075	0.0174973	0.640396	0.183157	0.908136	0.115402	0.71376
chr6:31283141-31283263	6.9066e-05	0.197747	4.93568e-13	1.16696e-15	2.58065e-26	6.47073e-21	0.454381	0.541905	0.744068	0.091758	0.401285	0.0495869	0.00106374	0.0778055	0.053509	0.272284	0.0658522	0.0615926
chr6:31300864-31300890	5.89953e-06	0.488361	5.75368e-15	6.85831e-16	6.57496e-27	1.14706e-23	0.405647	0.653529	0.776341	0.168262	0.360963	0.0223448	0.00138045	0.284815	0.051682	0.132687	0.000477556	0.087881
chr6:31301483-31301548	6.62178e-06	0.625217	6.43602e-14	4.93903e-15	9.3242e-26	1.05683e-23	0.639197	0.813433	0.82953	0.27974	0.49921	0.046481	0.00145512	0.194273	0.0767015	0.31837	0.000481595	0.0436902
chr6:31317970-31318527	0.175623	0.0084385	1.26388e-22	7.06462e-12	4.89232e-09	1.59396e-18	0.391597	0.0231137	0.0351842	0.0221927	6.89066e-05	0.491748	0.288856	0.00186506	0.164868	0.00893383	0.00621111	0.000221282
chr6:31318865-31318922	0.103241	0.0130598	9.93307e-23	6.41211e-10	8.68509e-11	4.24045e-15	0.144811	0.0622112	0.032304	0.0379068	8.74461e-05	0.965375	0.351031	0.0038929	0.200113	0.00933427	0.157765	0.00144136
chr6:31319971-31320102	0.152616	0.00807431	6.55772e-19	8.91393e-12	2.09689e-09	9.70927e-16	0.553253	0.0341512	0.109631	0.0544612	0.00012706	0.283311	0.217383	0.00213613	0.120323	0.00709005	0.00113578	0.000410258
chr6:31327603-31328023	0.143524	0.0279772	2.13411e-22	1.80211e-11	1.09804e-10	1.0153e-19	0.231104	0.0151227	0.0722762	0.0718611	1.65003e-05	0.690474	0.262226	0.00122132	0.165709	0.00171982	0.0136253	0.000187325
chr6:31329742-31329805	0.149753	0.113169	3.84796e-23	8.63477e-08	1.32233e-08	1.2811e-15	0.168676	0.0544696	0.130572	0.0506992	3.53375e-07	0.725926	0.575678	0.00628739	0.20736	0.000294426	0.0675112	0.000103052
chr6:31341858-31342203	0.181457	0.286146	1.76647e-18	9.36618e-12	4.23933e-18	7.91226e-22	0.561284	0.0498593	0.378734	0.0340964	0.000504903	0.581299	0.10068	0.00316587	0.0829477	0.00454491	0.0544806	5.89543e-05
chr6:31557399-31557543	0.45873	0.260165	4.61294e-10	0.00020134	0.00442763	3.16539e-11	0.539109	0.0125345	0.553038	0.030126	0.00308109	0.209826	0.313723	0.00169512	0.012244	0.152236	4.72223e-05	0.000436142
chr6:32269968-32270521	0.434935	0.584837	2.7939e-09	0.00107931	0.00315424	0.00255621	0.240169	0.121979	0.0455998	0.00308825	1.46851e-10	1.01785e-11	2.66096e-10	1.08982e-10	3.31471e-09	8.0618e-10	3.51181e-23	5.03865e-12
chr6:32346304-32346315	0.177414	0.243908	3.83468e-05	0.00223207	0.0307507	1.26047e-07	0.29815	0.105803	0.442464	0.223392	2.69695e-21	0.0018409	5.91325e-10	3.39378e-19	7.1609e-10	5.58233e-21	2.92094e-11	1.76128e-33
chr6:32358204-32358563	0.127025	0.150084	5.39303e-08	0.00143814	0.0251486	1.35752e-07	0.111235	0.0389649	0.178634	0.024805	6.71087e-16	2.45263e-05	1.51634e-09	1.67141e-13	3.87417e-10	2.40467e-14	3.65094e-15	1.71163e-21
chr6:32412938-32413008	0.120054	0.572607	0.000584159	0.0318565	0.00624194	0.0102853	0.14014	0.399772	0.12913	0.164196	7.23538e-20	3.15505e-11	2.16391e-10	5.14374e-18	1.83003e-13	9.06229e-27	1.04049e-13	1.69542e-27
chr6:32443948-32444070	0.0212778	0.604985	3.96849e-06	0.0929528	0.00821211	3.73795e-05	0.0615355	0.078401	0.309542	0.070954	1.61912e-23	4.34884e-10	2.20802e-13	1.02013e-26	5.98133e-11	1.0877e-32	1.72408e-15	3.33485e-39
chr6:32446642-32446659	0.0361971	0.528169	0.000296678	0.15745	0.0394438	0.0094283	0.0240957	0.0677713	0.115781	0.31515	1.19747e-17	3.47094e-12	1.81071e-14	1.41615e-17	5.12375e-10	1.24334e-19	6.32187e-16	2.27166e-24
chr6:32463177-32463353	0.53653	0.123855	0.000174717	0.0241099	0.00589182	0.00755462	0.0253961	0.297442	0.101805	0.0484385	7.62449e-08	1.0952e-09	5.32632e-11	1.63491e-15	4.10691e-13	5.27455e-16	3.91986e-34	1.05057e-17
chr6:32470465-32470611	0.705368	0.034314	0.00943966	0.00161527	0.03595	0.0799456	0.0245475	0.310825	0.0165029	0.0476988	1.40471e-11	2.78708e-07	4.71243e-10	1.9042e-16	9.62133e-16	2.90437e-24	3.46081e-20	5.07843e-25
chr6:32472588-32472731	0.821658	0.077495	0.000299232	0.000427731	0.00317404	0.0168335	0.00438355	0.156178	0.00330138	0.0950306	1.09439e-14	1.16085e-06	3.09287e-10	1.01372e-19	2.6507e-17	3.05586e-22	2.0622e-29	1.3484e-27
chr6:32477138-32477191	0.515325	0.386734	0.00814097	0.0456021	0.0528407	0.0588558	0.00376033	0.160738	0.0240149	0.0710565	5.99735e-10	0.00119483	1.65704e-05	9.03599e-21	2.61029e-08	5.28303e-23	5.96133e-25	5.48107e-31
chr6:32477302-32477371	0.00163377	0.405148	3.73098e-07	0.000823699	2.81924e-05	0.00172496	0.0987328	0.835855	0.264875	0.187367	1.03114e-24	2.34138e-15	7.19318e-12	6.44601e-21	4.00992e-19	5.83059e-22	5.24508e-22	5.43824e-31
chr6:32477645-32477823	0.0639483	0.198393	7.87049e-05	0.00240992	0.0023026	0.00963353	0.0269699	0.340562	0.00854255	0.0893231	3.15635e-21	1.02988e-11	4.04728e-13	2.42183e-15	1.80378e-18	3.62623e-22	4.56575e-26	8.4144e-35
chr6:32478139-32478914	0.586999	0.38508	0.024125	0.0030691	0.0199418	0.026046	0.0215306	0.207857	0.039945	0.0371942	2.69105e-06	0.0103803	9.93909e-06	1.93077e-21	1.50147e-09	2.23138e-21	3.32737e-28	4.22066e-29
chr6:32481997-32482296	0.0750332	0.512399	0.000431549	0.00435915	0.00383332	0.00412584	0.0146379	0.298223	0.0763424	0.150643	2.03969e-19	1.55422e-09	1.64751e-09	1.92158e-20	7.95956e-15	1.18024e-21	1.25679e-22	1.81383e-32
chr6:32482847-32483585	0.295644	0.663357	0.000117442	0.0348878	0.0586408	0.0449812	0.00351532	0.0387657	0.00248878	0.0108226	7.3112e-22	1.03627e-08	8.61982e-06	2.22064e-30	3.38301e-07	1.37685e-23	1.23005e-21	1.3647e-35
chr6:32485766-32485792	0.754336	0.720922	0.0227129	0.233399	0.16798	0.413468	0.0855535	0.28823	0.313074	0.288998	2.02991e-14	9.2157e-09	6.72434e-05	2.27875e-16	1.36519e-07	2.36829e-19	2.11866e-25	1.40291e-23
chr6:32501153-32501446	0.04492	0.760456	7.98171e-07	0.00360172	0.000127814	0.000956124	0.135398	0.239397	0.409108	0.336827	1.57278e-30	5.41694e-14	1.28896e-12	4.20517e-36	6.45551e-16	3.40123e-28	7.91504e-16	1.26279e-52
chr6:32510757-32511014	0.0924609	0.830119	3.03168e-06	0.00707881	0.00729863	0.0742595	0.102838	0.167453	0.0452783	0.161144	5.36116e-31	7.24964e-09	2.44124e-08	1.0842e-40	1.43122e-08	7.68741e-28	7.44934e-13	2.37244e-57
chr6:32514164-32514539	0.118711	0.725589	4.85313e-06	0.0171981	0.00922443	0.00384756	0.103331	0.128337	0.1053	0.282201	1.19134e-24	1.95755e-06	1.23609e-07	5.4222e-41	4.28685e-09	1.21155e-31	9.16339e-14	4.19711e-59
chr6:32518536-32518889	0.382793	0.283843	0.00887356	0.000772776	0.0845899	0.00192962	0.0538529	0.0611581	0.138255	0.239056	1.76197e-17	3.93295e-05	3.35582e-07	5.47754e-33	9.57641e-09	2.64681e-29	4.34486e-18	1.56551e-51
chr6:32522667-32523071	0.0750964	0.661852	9.31041e-07	0.00722586	0.00227187	0.00529146	0.0582195	0.0653418	0.13423	0.0639287	2.93008e-23	1.86052e-07	7.34082e-07	6.09422e-39	1.88766e-07	5.69892e-30	1.87303e-13	1.24003e-51
chr6:32524049-32524870	0.180484	0.616465	4.15799e-05	0.0287673	0.0147582	0.0217952	0.0396252	0.0768899	0.0965899	0.176651	6.6805e-23	3.43254e-07	4.06896e-09	5.43005e-45	3.17444e-10	4.62269e-34	5.03324e-21	4.35508e-61
chr6:32525988-32526141	0.374374	0.822897	9.16074e-06	0.101323	0.0370921	0.00594066	0.035983	0.133266	0.123453	0.221878	3.45232e-21	3.384e-09	1.21211e-06	1.52649e-43	8.06802e-10	1.87571e-32	3.88974e-14	8.91609e-52
chr6:32528094-32528550	0.111706	0.431197	1.74908e-07	0.00632074	1.15205e-05	0.0111529	0.0801331	0.346933	0.0932101	0.0628939	9.27486e-26	5.32675e-07	1.18967e-08	2.53377e-29	9.67652e-10	1.86823e-21	1.66565e-10	4.91546e-40
chr6:32530827-32531271	0.223778	0.644363	4.13231e-05	0.00768747	0.0278279	0.000177703	0.0503037	0.196772	0.0584459	0.220168	1.20261e-28	9.34945e-06	7.85633e-09	8.24082e-42	3.75971e-11	1.66148e-32	1.95105e-12	1.837e-62
chr6:32533156-32533758	0.140522	0.426041	5.31088e-05	0.0104563	0.0186707	0.00504995	0.0132362	0.0581669	0.0416582	0.142972	1.37789e-25	1.18319e-05	2.60044e-12	6.7132e-40	7.4956e-14	5.10603e-32	3.43711e-24	6.30753e-54
chr6:32534320-32534555	0.134349	0.568525	2.41384e-06	0.0112525	0.0175471	0.00099482	0.0139421	0.041381	0.0689716	0.111802	4.60536e-27	2.8251e-06	6.49283e-10	2.67455e-45	3.61615e-12	1.2522e-34	1.39285e-18	2.95653e-55
chr6:32534615-32534640	0.113658	0.609813	1.35466e-06	0.0137204	0.0291465	0.00091287	0.0215531	0.0433669	0.134518	0.0822342	4.43814e-26	1.99056e-07	8.90433e-09	1.28031e-46	4.07823e-10	2.5149e-38	2.80966e-15	1.32569e-58
chr6:32534662-32534790	0.095184	0.163002	0.00135714	0.0101481	0.0628751	0.0064604	0.0233473	0.22483	0.0165856	0.0122772	1.05742e-18	2.46856e-08	1.03529e-11	2.10031e-25	5.03601e-16	2.87475e-27	3.67464e-30	2.21278e-41
chr6:32534967-32535185	0.187241	0.170579	1.87453e-05	0.0127014	0.0223509	0.00260574	0.013124	0.175918	0.112312	0.270161	5.16264e-27	4.69985e-05	5.65281e-10	1.15689e-32	1.32924e-15	2.307e-28	6.12885e-23	1.46157e-43
chr6:32535314-32535799	0.434628	0.386802	5.15456e-06	0.0439755	0.00952036	0.0112161	0.00987957	0.0592505	0.0107386	0.163177	1.31106e-31	1.01669e-07	4.1822e-12	2.48135e-37	2.49087e-13	1.19349e-27	6.30405e-19	3.6959e-46
chr6:32536976-32537799	0.191027	0.653576	1.0627e-06	0.0268599	0.00519503	0.000507278	0.0328606	0.130748	0.104538	0.218677	1.93173e-32	1.88119e-07	1.89287e-09	8.6182e-45	7.46542e-11	1.5939e-35	2.45238e-13	5.01542e-61
chr6:32539057-32539166	0.240889	0.250049	3.90265e-05	0.00362771	0.0440988	0.00158296	0.0830029	0.197241	0.0766839	0.0863073	1.01377e-25	1.00582e-05	9.13292e-07	1.69986e-41	2.60683e-09	6.7987e-31	7.63288e-11	7.37026e-59
chr6:32539703-32539829	0.098371	0.69001	3.86619e-05	0.17894	0.0244821	0.0170912	0.0231099	0.273176	0.0785889	0.0930779	1.22284e-22	0.00155056	2.99671e-08	9.05766e-34	7.98508e-11	3.21963e-28	1.16774e-16	2.75768e-48
chr6:32540161-32540339	0.332249	0.197085	2.95689e-06	0.00641959	0.0412682	0.00144495	0.0611264	0.104296	0.138296	0.18743	4.63341e-24	0.000357015	2.57075e-08	9.86374e-40	1.16996e-11	5.51477e-32	2.16185e-16	1.95426e-43
chr6:32543751-32544442	0.320541	0.545493	2.05325e-06	0.0143061	0.0368316	0.00151112	0.0189366	0.0804669	0.0934437	0.0949002	8.03389e-32	8.31633e-06	9.1654e-09	7.55037e-49	2.0792e-12	4.51761e-38	3.20672e-17	5.60644e-67
chr6:32544756-32545082	0.253002	0.528806	2.89028e-06	0.0188116	0.0612282	0.000564358	0.0217677	0.204166	0.029581	0.0927948	1.3513e-28	0.000142235	6.32528e-07	2.19734e-45	5.28484e-11	3.64382e-33	2.04452e-12	3.37482e-54
chr6:32545402-32545456	0.37259	0.126336	2.8074e-05	0.00104814	0.0883854	0.0014936	0.0443987	0.114226	0.099648	0.051085	8.56223e-37	3.78181e-11	1.26299e-12	1.07324e-36	8.65184e-22	1.3595e-27	4.84994e-27	1.98433e-33
chr6:32545600-32546249	0.129714	0.419765	8.2222e-06	0.00380813	0.0165445	0.00749918	0.00709673	0.0290337	0.023731	0.146865	4.34014e-30	1.04505e-06	1.26371e-13	2.2036e-43	1.66132e-16	2.78623e-32	6.59831e-27	4.40481e-52
chr6:32548552-32548590	0.100923	0.530044	2.00192e-06	0.0211136	0.0164097	0.00470682	0.0350313	0.116687	0.0691181	0.0424321	3.38005e-30	6.62884e-07	3.88312e-09	2.57023e-50	1.90524e-11	1.02761e-36	1.62345e-15	2.97477e-63
chr6:32549470-32549672	0.281441	0.772151	5.13341e-07	0.0428914	0.000707306	0.0102746	0.0789007	0.135592	0.0193783	0.033094	6.57731e-19	0.00016155	1.82283e-06	7.52456e-36	3.64482e-09	5.03421e-26	7.03853e-15	2.64878e-37
chr6:32550212-32550384	0.28915	0.229597	0.000197961	0.00222587	0.0373338	0.00555002	0.00517894	0.0652315	0.017989	0.254669	3.26564e-26	2.48132e-06	1.26102e-12	2.9609e-35	3.67393e-18	1.62398e-28	1.09282e-28	1.72828e-42
chr6:32550591-32550628	0.251154	0.425431	5.59941e-05	0.0323622	0.123168	0.000157456	0.0359707	0.302128	0.0538573	0.0718058	4.82552e-24	0.000816874	8.96655e-10	1.70576e-32	2.17728e-16	5.36651e-29	5.40347e-26	7.72536e-52
chr6:32551781-32551949	0.153505	0.201001	8.87276e-06	0.0115727	0.0242408	0.000645312	0.027679	0.0802774	0.0578263	0.0775996	1.07175e-27	0.000129587	1.78148e-11	7.3251e-39	2.21483e-15	3.25549e-30	2.19975e-22	1.56742e-51
chr6:32553638-32553923	0.143788	0.243025	6.287e-06	3.97832e-05	0.00175042	1.31286e-05	0.228298	0.589139	0.752888	0.429429	5.15478e-28	2.10947e-14	1.11773e-08	4.90356e-46	3.15448e-22	4.43187e-26	4.75623e-07	7.82975e-36
chr6:32554429-32555206	0.307933	0.641976	1.6071e-07	0.0210281	0.0112032	0.0030125	0.0204507	0.136674	0.0224811	0.0153506	4.773e-33	8.01811e-07	1.82042e-08	5.56359e-50	8.94233e-13	2.19712e-33	1.27077e-13	5.93027e-58
chr6:32555359-32555783	0.106372	0.838848	1.18969e-08	0.0157184	0.00199834	0.00027275	0.213864	0.263494	0.481868	0.047201	1.66512e-32	1.93271e-09	8.23594e-06	1.1408e-49	4.97172e-11	2.80911e-30	1.17199e-06	4.43817e-58
chr6:32557405-32557611	0.373382	0.430224	7.97865e-06	0.00273847	0.0526107	0.00315209	0.0539768	0.103086	0.0513887	0.195636	4.29445e-29	1.35972e-06	1.07068e-06	4.33361e-48	1.5315e-12	2.15147e-29	1.96383e-09	1.00767e-42
chr6:32558479-32558659	0.161333	0.517553	1.11429e-05	0.00633645	0.0120707	0.00188497	0.0242169	0.152985	0.0592257	0.0840175	6.01324e-33	4.7724e-11	1.11622e-12	2.8507e-36	1.17215e-11	2.69554e-29	7.01196e-14	3.02517e-50
chr6:32558833-32559458	0.151318	0.66934	3.31661e-06	0.0299705	0.0119152	0.000434271	0.0304682	0.082771	0.12568	0.167557	1.9596e-27	3.16965e-07	3.87452e-09	1.2114e-43	4.22548e-11	5.28704e-35	1.68406e-15	6.44345e-59
chr6:32562172-32562631	0.186138	0.488916	6.83889e-06	0.0550452	0.209437	0.00173896	0.0450308	0.297243	0.0551594	0.0160608	3.60632e-25	6.20152e-07	2.81066e-05	2.2601e-44	1.17647e-09	2.31696e-30	1.70385e-14	2.91744e-50
chr6:32563339-32565354	0.165772	0.640321	4.13523e-07	0.0202265	0.0234511	0.00222526	0.0272694	0.173161	0.0454962	0.0617376	8.2052e-27	7.22173e-05	3.28573e-06	5.92619e-50	1.92341e-09	2.52589e-37	2.46027e-12	1.91084e-67
chr6:32565750-32567186	0.0781375	0.476284	2.88932e-06	0.0188108	0.0608258	0.00293955	0.0197334	0.254864	0.047495	0.0815619	6.09643e-27	0.000452113	4.85965e-07	8.41452e-44	1.07359e-10	5.52616e-33	4.8737e-16	3.44974e-55
chr6:32570472-32570779	0.40142	0.618504	1.66387e-06	0.0308622	0.0276471	0.000871587	0.0511994	0.177083	0.0580404	0.19393	2.42832e-28	4.33319e-07	2.73445e-06	4.2945e-44	1.01307e-09	3.18996e-31	1.34527e-10	3.01247e-61
chr6:32571487-32572114	0.103988	0.327203	0.000153458	0.000555777	0.0396832	0.00815559	0.064142	0.204447	0.0242797	0.0702445	3.38808e-27	2.23549e-05	1.71013e-06	5.378e-44	1.63998e-13	5.92441e-29	1.48434e-11	8.29223e-40
chr6:32572906-32572966	0.188835	0.5912	2.02929e-06	0.00783171	0.0186986	0.000512941	0.0299576	0.0754985	0.0243892	0.0132768	1.31492e-28	0.000677469	8.66388e-07	1.05249e-48	2.99622e-11	1.457e-33	1.02122e-11	6.52892e-64
chr6:32574091-32575342	0.225287	0.51097	4.80846e-06	0.0140911	0.025125	0.00441105	0.0166266	0.0332507	0.0156481	0.0241366	2.67999e-28	1.02744e-06	5.11562e-08	3.12865e-51	5.63213e-13	1.93625e-34	1.15958e-19	7.96648e-58
chr6:32577390-32578850	0.252087	0.411033	1.24032e-05	0.00768733	0.0481318	0.018194	0.0243032	0.0408027	0.0478423	0.0276569	4.5017e-26	7.20845e-08	2.58737e-07	6.11802e-50	1.17465e-15	1.16355e-33	1.47071e-23	4.89136e-45
chr6:32580544-32581028	0.250264	0.454036	2.17833e-06	0.0299617	0.00670432	0.00445097	0.0152297	0.025537	0.0168739	0.00941464	3.67421e-29	3.41149e-06	3.66881e-09	5.00924e-48	4.785e-14	2.5728e-31	1.44751e-20	3.95251e-56
chr6:32581351-32581720	0.00145734	0.457654	2.62689e-08	0.00430852	9.06155e-08	0.00159156	0.0328714	0.303643	0.327046	0.218733	3.54908e-28	3.93179e-17	4.03999e-16	3.553e-24	7.19649e-19	1.15088e-21	1.53731e-24	8.79003e-32
chr6:32581854-32582159	0.177513	0.471019	1.33783e-05	0.00819694	0.0418185	0.0105494	0.00592083	0.0220036	0.0283253	0.0960423	1.95568e-29	1.03533e-07	8.57979e-11	6.93129e-48	3.73436e-15	6.68445e-36	1.02597e-22	1.10806e-51
chr6:32582710-32583620	0.0957349	0.743167	9.01975e-07	0.0172679	0.00356143	0.00540955	0.0353288	0.0504466	0.0821912	0.0993632	9.96731e-29	2.50194e-08	3.15532e-09	4.55379e-51	1.82306e-11	1.20265e-37	3.5312e-19	1.27587e-67
chr6:32585365-32586609	0.070098	0.309853	1.01218e-05	0.029018	0.00508215	0.00327518	0.00360087	0.0569281	0.0316384	0.0662902	1.83262e-25	1.72551e-08	6.13613e-10	2.31563e-48	6.38151e-13	6.53214e-36	1.08032e-18	6.52789e-63
chr6:32587104-32587856	0.0679818	0.437776	5.055e-06	0.0117692	0.0215261	0.00705587	0.0128303	0.071641	0.0359289	0.135347	7.12716e-27	2.09238e-05	3.84629e-10	4.40518e-46	5.93421e-12	1.15933e-35	1.31995e-21	2.97891e-57
chr6:32590193-32591186	0.54609	0.235144	0.000113188	0.0016028	0.0646828	0.0114768	0.0194423	0.0736008	0.0232216	0.118023	1.877e-30	2.02192e-09	7.64157e-08	1.29174e-50	3.16552e-17	1.66558e-28	1.13431e-14	9.6001e-37
chr6:32597671-32598163	0.300971	0.297566	5.39658e-05	0.000413838	0.0483125	0.0154672	0.0292719	0.0328398	0.042741	0.0993203	2.63714e-31	2.66438e-09	4.37238e-08	2.03853e-46	1.79823e-18	4.21872e-29	2.13252e-13	4.94174e-35
chr6:32599571-32600120	0.4685	0.634406	1.05587e-05	0.0159887	0.0274216	0.00797613	0.0437095	0.0526369	0.0350413	0.0921208	2.83293e-30	4.9788e-07	9.71595e-08	6.87699e-48	3.09282e-13	1.95402e-34	5.58521e-15	2.0207e-51
chr6:32600652-32600986	0.494817	0.346985	0.00153498	0.0180283	0.0774666	0.211831	0.0621157	0.281259	0.103865	0.303104	4.0595e-25	3.68654e-09	5.81165e-08	3.94471e-38	1.16953e-15	1.02428e-24	7.92193e-13	2.14574e-28
chr6:32601331-32601431	0.199382	0.206289	0.000104162	0.000455117	0.018466	0.305545	0.00761958	0.161425	0.00473801	0.379054	2.83686e-24	9.19664e-12	1.10256e-12	6.88982e-34	4.82572e-20	3.52576e-26	3.6997e-21	8.44489e-26
chr6:32602302-32603266	0.287647	0.569014	3.36132e-05	0.00222903	0.0232609	0.00806307	0.0214114	0.0310856	0.0303516	0.0582357	2.90398e-30	5.46443e-08	1.25591e-10	1.1523e-46	1.34387e-17	4.52406e-32	5.61185e-17	1.28791e-41
chr6:32605489-32605762	0.204409	0.0248312	1.4736e-06	9.70301e-05	0.00921297	0.0131934	0.0221764	0.0248761	0.00878173	0.118158	7.60809e-34	1.491e-10	4.47276e-11	6.59189e-40	4.47433e-21	4.33958e-29	1.44724e-20	1.34706e-32
chr6:32607736-32608260	0.230511	0.685585	6.68034e-06	0.00731331	0.0141218	0.00882614	0.0136147	0.0433861	0.00264629	0.0175069	2.09717e-33	3.51378e-07	1.66125e-09	1.24265e-44	5.79026e-14	9.29954e-29	6.54623e-12	6.20972e-41
chr6:32608393-32609041	0.253606	0.196548	2.29001e-05	0.000162577	0.0156037	0.0353826	0.016137	0.0138193	0.0216371	0.0931158	1.2176e-29	2.94509e-09	2.79286e-11	9.6154e-45	1.00035e-19	8.03268e-32	3.84192e-20	1.45614e-34
chr6:32610979-32611300	0.232531	0.403368	1.38685e-05	0.016327	0.0283257	0.00678898	0.00578824	0.0211845	0.0520353	0.116985	7.22329e-30	3.02923e-07	7.3772e-11	4.34771e-43	2.43365e-13	1.91442e-35	8.63766e-23	1.20388e-50
chr6:32611433-32611550	0.486389	0.215478	2.21309e-05	0.00260274	0.0292781	0.00430136	0.0981873	0.146813	0.134591	0.193751	8.13671e-29	9.36492e-08	1.14797e-05	4.84107e-49	3.84807e-15	3.30646e-29	2.10712e-10	1.50493e-36
chr6:32611868-32612230	0.129341	0.189684	3.81924e-06	0.0026804	0.0186358	0.0213405	0.0264929	0.045519	0.0127246	0.17798	2.81281e-31	4.99847e-12	2.66907e-14	7.6583e-38	3.23697e-19	4.99968e-31	9.1892e-25	9.90269e-44
chr6:32613555-32614146	0.0909958	0.195244	4.72131e-06	0.00240125	0.00626835	0.177102	0.00819889	0.00143982	3.56153e-05	0.0221442	1.81939e-36	3.95276e-16	3.43495e-20	6.79204e-33	3.24794e-19	2.05232e-26	4.6095e-20	2.10269e-25
chr6:32619054-32619615	0.157188	0.0947811	5.07462e-06	0.00783163	0.0100113	0.000308397	0.0210988	0.266963	0.0183906	0.00865325	4.91922e-16	0.000194253	1.37566e-09	1.04314e-40	2.05889e-15	9.46725e-36	8.45221e-16	1.47347e-57
chr6:32619990-32620196	0.262818	0.162956	0.029187	0.120163	0.0117153	0.20108	0.0637938	0.619415	0.0173365	0.0103481	2.48346e-27	1.29021e-28	9.5222e-21	1.01957e-15	8.08483e-27	2.43608e-19	8.40859e-24	5.74693e-29
chr6:32621746-32622065	0.0907479	0.403111	2.19698e-07	0.0198195	0.00267565	0.00615093	0.00336717	0.0278665	0.0227137	0.0303383	3.44443e-26	5.65254e-08	9.50155e-13	9.32911e-39	2.59349e-12	2.20905e-35	4.0786e-20	1.50099e-59
chr6:32624568-32625421	0.126626	0.405842	1.96047e-06	0.0144101	0.0174979	0.00197516	0.00952704	0.138636	0.0258569	0.0687588	5.65145e-23	2.12378e-08	1.75898e-11	3.88641e-37	4.12138e-10	3.91007e-38	4.56795e-17	1.80821e-63
chr6:32626229-32626236	0.105652	0.323921	8.61683e-05	0.0155405	0.0151249	0.00489277	0.00782625	0.254073	0.0203618	0.158582	8.96064e-19	1.32659e-07	5.45269e-10	3.59827e-31	3.04091e-08	2.9802e-33	3.73868e-13	4.00391e-56
chr6:32627826-32627833	0.295433	0.0845763	0.0127585	0.00493999	0.116034	0.0658525	0.0438292	0.81215	0.0139629	0.00899444	6.41568e-17	9.96936e-20	1.73702e-15	3.81836e-20	1.83854e-20	3.25585e-23	1.49825e-27	6.46875e-37
chr6:32634791-32635096	0.544271	0.0409949	0.0223426	0.0744276	0.117343	0.066836	0.024757	0.64311	0.01686	0.00214155	6.22792e-18	5.76181e-17	1.36304e-12	2.71274e-23	4.95053e-19	8.0054e-23	1.96065e-23	2.50513e-42
chr6:32636048-32636923	0.758812	0.14753	0.000583968	0.012703	0.220406	0.108698	0.106416	0.189845	0.0194351	0.421109	1.08616e-39	9.75458e-18	5.05566e-20	8.30329e-43	6.11105e-16	1.79708e-26	3.24789e-09	6.73769e-24
chr6:32637748-32637990	0.286352	0.0149377	0.000123721	0.0407095	0.180371	0.00674307	0.00516634	0.121908	0.0127407	0.236042	2.73422e-41	1.55722e-09	1.89182e-12	3.87155e-42	2.56311e-10	1.04142e-25	3.58478e-12	3.19144e-33
chr6:32638580-32638669	0.769004	0.0176873	0.00528359	0.0159789	0.2671	0.0217922	0.00758115	0.222853	0.00252852	0.0293751	1.70917e-38	4.53684e-09	1.08512e-06	5.3108e-48	1.2675e-07	1.03787e-24	8.6095e-06	2.53265e-33
chr6:32639100-32640436	0.340866	0.037788	4.56994e-05	0.00231759	0.128848	0.150833	0.022497	0.0762644	0.000408626	0.115874	1.37867e-42	3.3564e-18	5.68483e-18	7.08962e-50	5.7259e-17	1.17197e-26	6.49887e-14	3.40951e-25
chr6:32641081-32641436	0.909692	0.0641489	0.0106765	0.0617785	0.378451	0.133547	0.134126	0.544324	0.0406183	0.157195	3.33244e-35	2.09688e-22	7.4801e-14	4.95226e-42	1.7077e-18	5.34914e-25	5.51214e-11	1.46562e-28
chr6:32643872-32644227	0.332132	0.0234218	0.000987278	0.00133639	0.17851	0.246849	0.0404003	0.147174	8.52982e-05	0.0885453	2.14719e-39	1.01248e-19	4.68832e-20	2.13561e-46	2.33146e-15	7.29597e-27	1.19181e-09	5.06407e-20
chr6:32645457-32647107	0.505391	0.0259004	0.000182948	0.013634	0.38805	0.307768	0.0401941	0.206603	0.000527333	0.0566939	3.80521e-39	8.67523e-14	6.34735e-10	1.0809e-57	3.10719e-10	1.05388e-27	4.73816e-08	6.6999e-24
chr6:32648025-32648065	0.673803	0.0359464	0.000805348	0.00777637	0.461427	0.33525	0.0755554	0.146938	0.000329818	0.0730763	1.40444e-36	2.86449e-14	2.75241e-10	8.54729e-59	4.40422e-11	1.4184e-27	7.41912e-07	1.209e-20
chr6:32652657-32653051	0.465012	0.0380454	0.000333245	0.00149646	0.152973	0.342688	0.0782056	0.092993	0.00014123	0.177029	2.13625e-38	1.39587e-19	1.10019e-18	4.47321e-51	1.63277e-16	3.15538e-26	1.29999e-09	3.12777e-17
chr6:32661176-32661417	0.451192	0.043683	0.000417485	0.00222273	0.277347	0.116862	0.0263363	0.139498	8.84768e-05	0.100648	1.44903e-38	9.86435e-14	9.92889e-13	2.87791e-55	1.10354e-12	2.68226e-27	6.29534e-07	2.73837e-19
chr6:32662178-32662362	0.534125	0.0702861	3.11046e-06	0.0382088	0.0467229	0.00696656	0.147161	0.161991	0.0470428	0.0879163	3.5891e-36	5.04702e-10	8.2165e-14	1.82602e-50	7.93802e-11	2.01477e-31	1.50356e-07	2.29256e-33
chr6:32662687-32663415	0.534046	0.116259	3.87931e-05	0.0065371	0.0141826	0.0106419	0.0307704	0.150055	0.0016666	0.192166	1.7815e-39	4.96555e-13	3.73624e-16	1.01963e-57	2.39091e-11	1.12995e-35	5.55655e-10	1.16262e-37
chr6:32664208-32664304	0.0208716	0.117721	4.35078e-06	0.0227442	0.0137101	0.681197	0.0204302	0.0222804	4.18555e-05	0.325424	1.45051e-22	6.43077e-08	3.81332e-12	3.58059e-23	2.80817e-09	4.3756e-16	1.34608e-06	1.94003e-11
chr6:32667583-32667886	0.467988	0.0480181	0.000963392	0.000946081	0.23169	0.212722	0.0475625	0.143328	0.000244493	0.0883096	5.56887e-37	2.9269e-18	1.30068e-17	8.45538e-55	1.62477e-15	6.34311e-27	1.32507e-08	8.78628e-17
chr6:32672407-32672995	0.65169	0.00509613	0.00153831	0.0673998	0.246212	0.00368422	0.52285	0.288046	0.058137	0.0714478	2.63584e-18	6.99161e-17	3.88517e-12	3.06766e-37	1.10776e-16	6.82277e-21	3.76421e-11	2.17537e-21
chr6:32674070-32674461	0.0747549	0.0322598	0.00209619	0.000229181	0.193731	0.00023639	0.786278	0.22336	0.210016	0.141493	2.90968e-21	1.7659e-23	6.18468e-23	6.24912e-35	2.87053e-21	9.08454e-23	1.14059e-12	3.01996e-17
chr6:32675204-32675390	0.109211	0.0100725	0.0059517	0.0777376	0.10495	0.0116564	0.829208	0.40846	0.093395	0.0960045	7.43919e-19	5.56901e-14	2.15911e-11	5.1448e-28	5.86525e-16	2.47423e-15	3.47106e-08	2.5431e-16
chr6:32681420-32682054	0.497817	0.0181064	0.00810778	0.00444819	0.0920297	0.00428803	0.742801	0.203643	0.0591564	0.146903	6.89504e-25	1.51734e-26	1.08716e-29	4.35579e-34	6.74775e-24	5.06293e-26	3.41295e-14	6.3823e-22
chr6:32683586-32684874	0.0151433	0.0164222	0.000643588	0.000128774	0.166898	0.000306215	0.904775	0.310708	0.830513	0.409464	1.54598e-22	1.57176e-27	8.20963e-37	4.51653e-36	2.22014e-25	1.61379e-25	4.93745e-13	1.40438e-16
chr6:32686397-32687030	0.0496424	0.0306745	0.000333705	0.00135637	0.103473	0.000334494	0.932574	0.23847	0.507512	0.367035	2.67928e-22	7.86764e-29	7.27383e-35	3.66391e-34	5.14508e-27	4.4015e-25	1.73681e-15	1.43408e-18
chr6:32695126-32695483	0.0698751	0.156025	4.93126e-06	0.00017466	0.0184501	4.5047e-05	0.693068	0.331595	0.642535	0.119134	8.61594e-28	4.64753e-23	3.55281e-33	5.15289e-38	2.95246e-24	1.73292e-26	5.14367e-11	5.27362e-20
chr6:32706250-32706306	0.579597	0.876102	0.00048798	0.0296811	0.0151549	0.00156475	0.0826125	0.182243	0.243029	0.537665	9.82727e-31	6.37707e-08	5.21568e-12	2.22159e-47	3.62003e-10	6.42758e-26	3.79279e-07	1.41072e-28
chr6:32707060-32707371	0.0509481	0.108681	9.90939e-05	0.00206365	0.00902483	5.86056e-06	0.80891	0.179889	0.0732391	0.11695	6.68717e-23	2.14497e-24	2.7278e-37	1.23845e-27	3.27511e-25	1.61081e-23	7.95393e-14	1.71812e-16
chr6:32707972-32708649	0.0417793	0.20235	4.46594e-05	0.00171216	0.00552134	2.18309e-05	0.824364	0.398778	0.0517526	0.134906	4.64486e-21	3.08852e-24	6.30974e-33	2.09431e-28	1.61373e-26	7.57092e-24	9.88339e-15	2.25938e-17
chr6:32712344-32712646	0.0123627	0.0539321	4.9948e-06	0.00104805	0.00135211	4.22533e-06	0.346756	0.293819	0.00161647	0.0323685	1.6949e-23	1.98479e-19	1.36017e-24	1.01463e-27	1.51748e-24	7.38487e-28	2.53022e-10	9.06188e-19
chr6:33131694-33131944	0.0585013	0.245011	0.737065	0.00984437	0.101631	0.215516	0.419456	0.101766	9.63742e-11	6.54621e-06	0.605683	0.0677554	0.216618	0.0825148	0.215407	0.00164534	0.248258	0.723426
