# Supplementary material for: High-resolution DNA methylation screening of the major histocompatibility complex in multiple sclerosis
Source: Front Neurol. 2023 Dec 8;14:1326738. doi: 10.3389/fneur.2023.1326738 (PMC10739394; doi:10.3389/fneur.2023.1326738)
Supplement: Supplementary file 6 [file Table_5.XLSX]

## Sheet: cis_mqtl_FDR0.05_chr6_snp_DMRs_
DMR	SNP	SNP_annotation	SNP_GeneName	DMR_annotation	DMR_GeneName
chr6_30220380_30220423	rs2523399	intron (NR_026972, intron 4 of 5).6	HLA-F	Intergenic	TRIM26
chr6_30220380_30220423	rs1633068	Intergenic	IFITM4P	Intergenic	TRIM26
chr6_30220380_30220423	rs3094165	Intergenic	HCP5B	Intergenic	TRIM26
chr6_30220380_30220423	rs2860580	Intergenic	HLA-A	Intergenic	TRIM26
chr6_30220380_30220423	rs2523946	promoter-TSS (NR_028032)	HCG9	Intergenic	TRIM26
chr6_30220380_30220423	rs757260	intron (NM_001286633, intron 4 of 5).3	TRIM40	Intergenic	TRIM26
chr6_30220380_30220423	rs1034323	Intergenic	RPP21	Intergenic	TRIM26
chr6_30240007_30240096	rs1633068	Intergenic	IFITM4P	intron (NR_052012, intron 3 of 4)	HLA-L
chr6_30240007_30240096	rs1611493	Intergenic	HCG4B	intron (NR_052012, intron 3 of 4)	HLA-L
chr6_30240007_30240096	rs2860580	Intergenic	HLA-A	intron (NR_052012, intron 3 of 4)	HLA-L
chr6_30240007_30240096	rs757260	intron (NM_001286633, intron 4 of 5).3	TRIM40	intron (NR_052012, intron 3 of 4)	HLA-L
chr6_30240007_30240096	rs1034323	Intergenic	RPP21	intron (NR_052012, intron 3 of 4)	HLA-L
chr6_30240007_30240096	rs1075496	intron (NM_001270707, intron 1 of 3).6	NRM	intron (NR_052012, intron 3 of 4)	HLA-L
chr6_30246147_30246369	rs2022065	3' UTR (NM_052828, exon 8 of 8).3	TRIM10	intron (NR_052012, intron 2 of 4)	HLA-L
chr6_30246147_30246369	rs1034323	Intergenic	RPP21	intron (NR_052012, intron 2 of 4)	HLA-L
chr6_31283141_31283263	rs7745906	Intergenic	HLA-C	Intergenic	HLA-C
chr6_31283141_31283263	rs1634747	Intergenic	LINC02571	Intergenic	HLA-C
chr6_31283141_31283263	rs2284178	non-coding (NR_040662, exon 2 of 2)	HCP5	Intergenic	HLA-C
chr6_31283141_31283263	rs11967206	TTS (NM_025258).2	SAPCD1-AS1	Intergenic	HLA-C
chr6_31300864_31300890	rs2284178	non-coding (NR_040662, exon 2 of 2)	HCP5	intron (NR_149115, intron 1 of 3)	LINC02571
chr6_31301483_31301548	rs2233956	promoter-TSS (NM_014070).6	C6orf15	non-coding (NR_149115, exon 1 of 4)	LINC02571
chr6_31301483_31301548	rs7745906	Intergenic	HLA-C	non-coding (NR_149115, exon 1 of 4)	LINC02571
chr6_31301483_31301548	rs2246954	intron (NR_149115, intron 1 of 3)	LINC02571	non-coding (NR_149115, exon 1 of 4)	LINC02571
chr6_31301483_31301548	rs1634747	Intergenic	LINC02571	non-coding (NR_149115, exon 1 of 4)	LINC02571
chr6_31301483_31301548	rs2156875	Intergenic	MIR6891	non-coding (NR_149115, exon 1 of 4)	LINC02571
chr6_31301483_31301548	rs11967206	TTS (NM_025258).2	SAPCD1-AS1	non-coding (NR_149115, exon 1 of 4)	LINC02571
chr6_31301483_31301548	rs480092	TTS (NM_021177).4	VARS	non-coding (NR_149115, exon 1 of 4)	LINC02571
chr6_31341858_31342203	rs7745906	Intergenic	HLA-C	Intergenic	MIR6891
chr6_31341858_31342203	rs10947213	intron (NM_001289161, intron 1 of 5).4	MICB	Intergenic	MIR6891
chr6_31341858_31342203	rs6929796	intron (NM_001144963, intron 2 of 3).4	NFKBIL1	Intergenic	MIR6891
chr6_31341858_31342203	rs1266071	promoter-TSS (NR_039789).3	MIR4646	Intergenic	MIR6891
chr6_32346304_32346315	rs2269425	intron (NR_037861, intron 4 of 15)	LOC100507547	intron (NM_001286475, intron 8 of 23).3	TSBP1
chr6_32346304_32346315	rs9268365	intron (NM_001286475, intron 5 of 23).3	TSBP1	intron (NM_001286475, intron 8 of 23).3	TSBP1
chr6_32346304_32346315	rs743862	Intergenic	BTNL2	intron (NM_001286475, intron 8 of 23).3	TSBP1
chr6_32346304_32346315	rs3129882	intron (NM_019111, intron 1 of 4).6	HLA-DRA	intron (NM_001286475, intron 8 of 23).3	TSBP1
chr6_32346304_32346315	rs3129890	Intergenic	HLA-DRA	intron (NM_001286475, intron 8 of 23).3	TSBP1
chr6_32346304_32346315	rs532098	Intergenic	HLA-DRB1	intron (NM_001286475, intron 8 of 23).3	TSBP1
chr6_32346304_32346315	rs9275224	Intergenic	HLA-DQB1	intron (NM_001286475, intron 8 of 23).3	TSBP1
chr6_32346304_32346315	rs3104402	Intergenic	HLA-DQA2	intron (NM_001286475, intron 8 of 23).3	TSBP1
chr6_32346304_32346315	rs3104405	Intergenic	HLA-DQA2	intron (NM_001286475, intron 8 of 23).3	TSBP1
chr6_32346304_32346315	rs9275601	Intergenic	HLA-DQA2	intron (NM_001286475, intron 8 of 23).3	TSBP1
chr6_32346304_32346315	rs9275602	Intergenic	HLA-DQA2	intron (NM_001286475, intron 8 of 23).3	TSBP1
chr6_32346304_32346315	rs7767167	Intergenic	HLA-DOB	intron (NM_001286475, intron 8 of 23).3	TSBP1
chr6_32412938_32413008	rs3134954	intron (NM_019105, intron 1 of 43)	TNXB	Intergenic	BTNL2
chr6_32412938_32413008	rs404860	intron (NM_004557, intron 11 of 29).2	NOTCH4	Intergenic	BTNL2
chr6_32412938_32413008	rs17842183	Intergenic	HLA-DQA1	Intergenic	BTNL2
chr6_32412938_32413008	rs9275224	Intergenic	HLA-DQB1	Intergenic	BTNL2
chr6_32412938_32413008	rs2858332	Intergenic	HLA-DQA2	Intergenic	BTNL2
chr6_32412938_32413008	rs3104402	Intergenic	HLA-DQA2	Intergenic	BTNL2
chr6_32412938_32413008	rs3104405	Intergenic	HLA-DQA2	Intergenic	BTNL2
chr6_32412938_32413008	rs7767167	Intergenic	HLA-DOB	Intergenic	BTNL2
chr6_32443948_32444070	rs6932542	Intergenic	BTNL2	intron (NM_019111, intron 4 of 4).6	HLA-DRA
chr6_32443948_32444070	rs532098	Intergenic	HLA-DRB1	intron (NM_019111, intron 4 of 4).6	HLA-DRA
chr6_32443948_32444070	rs3104405	Intergenic	HLA-DQA2	intron (NM_019111, intron 4 of 4).6	HLA-DRA
chr6_32443948_32444070	rs9275601	Intergenic	HLA-DQA2	intron (NM_019111, intron 4 of 4).6	HLA-DRA
chr6_32443948_32444070	rs151719	intron (NM_002118, intron 3 of 5).2	HLA-DMB	intron (NM_019111, intron 4 of 4).6	HLA-DRA
chr6_32477138_32477191	rs3134931	intron (NM_004557, intron 2 of 29).2	NOTCH4	Intergenic	HLA-DRA
chr6_32477138_32477191	rs411326	Intergenic	TSBP1-AS1	Intergenic	HLA-DRA
chr6_32477138_32477191	rs6932542	Intergenic	BTNL2	Intergenic	HLA-DRA
chr6_32477138_32477191	rs3129890	Intergenic	HLA-DRA	Intergenic	HLA-DRA
chr6_32477138_32477191	rs2157051	Intergenic	HLA-DQB1	Intergenic	HLA-DRA
chr6_32477138_32477191	rs3104402	Intergenic	HLA-DQA2	Intergenic	HLA-DRA
chr6_32477138_32477191	rs3104405	Intergenic	HLA-DQA2	Intergenic	HLA-DRA
chr6_32477138_32477191	rs9275601	Intergenic	HLA-DQA2	Intergenic	HLA-DRA
chr6_32477138_32477191	rs4713600	intron (NM_002800, intron 1 of 5).5	PSMB9	Intergenic	HLA-DRA
chr6_32477138_32477191	rs151719	intron (NM_002118, intron 3 of 5).2	HLA-DMB	Intergenic	HLA-DRA
chr6_32477302_32477371	rs3104405	Intergenic	HLA-DQA2	Intergenic	HLA-DRA
chr6_32477645_32477823	rs411326	Intergenic	TSBP1-AS1	Intergenic	HLA-DRA
chr6_32477645_32477823	rs9275224	Intergenic	HLA-DQB1	Intergenic	HLA-DRA
chr6_32478139_32478914	rs204993	intron (NM_002586, intron 4 of 8)	PBX2	Intergenic	HLA-DRA
chr6_32478139_32478914	rs411326	Intergenic	TSBP1-AS1	Intergenic	HLA-DRA
chr6_32478139_32478914	rs3129890	Intergenic	HLA-DRA	Intergenic	HLA-DRA
chr6_32478139_32478914	rs3104402	Intergenic	HLA-DQA2	Intergenic	HLA-DRA
chr6_32478139_32478914	rs3104405	Intergenic	HLA-DQA2	Intergenic	HLA-DRA
chr6_32478139_32478914	rs9275602	Intergenic	HLA-DQA2	Intergenic	HLA-DRA
chr6_32478139_32478914	rs7767167	Intergenic	HLA-DOB	Intergenic	HLA-DRA
chr6_32478139_32478914	rs151719	intron (NM_002118, intron 3 of 5).2	HLA-DMB	Intergenic	HLA-DRA
chr6_32481997_32482296	rs3134954	intron (NM_019105, intron 1 of 43)	TNXB	Intergenic	HLA-DRA
chr6_32481997_32482296	rs204993	intron (NM_002586, intron 4 of 8)	PBX2	Intergenic	HLA-DRA
chr6_32481997_32482296	rs404860	intron (NM_004557, intron 11 of 29).2	NOTCH4	Intergenic	HLA-DRA
chr6_32481997_32482296	rs3134931	intron (NM_004557, intron 2 of 29).2	NOTCH4	Intergenic	HLA-DRA
chr6_32481997_32482296	rs411326	Intergenic	TSBP1-AS1	Intergenic	HLA-DRA
chr6_32481997_32482296	rs9296015	Intergenic	TSBP1-AS1	Intergenic	HLA-DRA
chr6_32481997_32482296	rs6932542	Intergenic	BTNL2	Intergenic	HLA-DRA
chr6_32481997_32482296	rs743862	Intergenic	BTNL2	Intergenic	HLA-DRA
chr6_32481997_32482296	rs3129871	Intergenic	HLA-DRA	Intergenic	HLA-DRA
chr6_32481997_32482296	rs17842183	Intergenic	HLA-DQA1	Intergenic	HLA-DRA
chr6_32481997_32482296	rs2157051	Intergenic	HLA-DQB1	Intergenic	HLA-DRA
chr6_32481997_32482296	rs2858332	Intergenic	HLA-DQA2	Intergenic	HLA-DRA
chr6_32481997_32482296	rs3104402	Intergenic	HLA-DQA2	Intergenic	HLA-DRA
chr6_32481997_32482296	rs3104405	Intergenic	HLA-DQA2	Intergenic	HLA-DRA
chr6_32481997_32482296	rs7767167	Intergenic	HLA-DOB	Intergenic	HLA-DRA
chr6_32481997_32482296	rs151719	intron (NM_002118, intron 3 of 5).2	HLA-DMB	Intergenic	HLA-DRA
chr6_32482847_32483585	rs411326	Intergenic	TSBP1-AS1	Intergenic	HLA-DRA
chr6_32482847_32483585	rs6932542	Intergenic	BTNL2	Intergenic	HLA-DRA
chr6_32482847_32483585	rs743862	Intergenic	BTNL2	Intergenic	HLA-DRA
chr6_32482847_32483585	rs3129890	Intergenic	HLA-DRA	Intergenic	HLA-DRA
chr6_32482847_32483585	rs532098	Intergenic	HLA-DRB1	Intergenic	HLA-DRA
chr6_32482847_32483585	rs9275224	Intergenic	HLA-DQB1	Intergenic	HLA-DRA
chr6_32482847_32483585	rs3104402	Intergenic	HLA-DQA2	Intergenic	HLA-DRA
chr6_32482847_32483585	rs3104405	Intergenic	HLA-DQA2	Intergenic	HLA-DRA
chr6_32482847_32483585	rs7767167	Intergenic	HLA-DOB	Intergenic	HLA-DRA
chr6_32482847_32483585	rs151719	intron (NM_002118, intron 3 of 5).2	HLA-DMB	Intergenic	HLA-DRA
chr6_32485766_32485792	rs3134954	intron (NM_019105, intron 1 of 43)	TNXB	Intergenic	HLA-DRB5
chr6_32485766_32485792	rs204993	intron (NM_002586, intron 4 of 8)	PBX2	Intergenic	HLA-DRB5
chr6_32485766_32485792	rs411326	Intergenic	TSBP1-AS1	Intergenic	HLA-DRB5
chr6_32485766_32485792	rs6932542	Intergenic	BTNL2	Intergenic	HLA-DRB5
chr6_32485766_32485792	rs743862	Intergenic	BTNL2	Intergenic	HLA-DRB5
chr6_32485766_32485792	rs3129871	Intergenic	HLA-DRA	Intergenic	HLA-DRB5
chr6_32485766_32485792	rs3129882	intron (NM_019111, intron 1 of 4).6	HLA-DRA	Intergenic	HLA-DRB5
chr6_32485766_32485792	rs2157051	Intergenic	HLA-DQB1	Intergenic	HLA-DRB5
chr6_32485766_32485792	rs9275224	Intergenic	HLA-DQB1	Intergenic	HLA-DRB5
chr6_32485766_32485792	rs3104402	Intergenic	HLA-DQA2	Intergenic	HLA-DRB5
chr6_32485766_32485792	rs3104405	Intergenic	HLA-DQA2	Intergenic	HLA-DRB5
chr6_32485766_32485792	rs9275601	Intergenic	HLA-DQA2	Intergenic	HLA-DRB5
chr6_32485766_32485792	rs9275602	Intergenic	HLA-DQA2	Intergenic	HLA-DRB5
chr6_32485766_32485792	rs7767167	Intergenic	HLA-DOB	Intergenic	HLA-DRB5
chr6_32485766_32485792	rs151719	intron (NM_002118, intron 3 of 5).2	HLA-DMB	Intergenic	HLA-DRB5
chr6_32501153_32501446	rs3134931	intron (NM_004557, intron 2 of 29).2	NOTCH4	Intergenic	HLA-DRB5
chr6_32501153_32501446	rs411326	Intergenic	TSBP1-AS1	Intergenic	HLA-DRB5
chr6_32501153_32501446	rs6932542	Intergenic	BTNL2	Intergenic	HLA-DRB5
chr6_32501153_32501446	rs743862	Intergenic	BTNL2	Intergenic	HLA-DRB5
chr6_32501153_32501446	rs3129882	intron (NM_019111, intron 1 of 4).6	HLA-DRA	Intergenic	HLA-DRB5
chr6_32501153_32501446	rs532098	Intergenic	HLA-DRB1	Intergenic	HLA-DRB5
chr6_32501153_32501446	rs2157051	Intergenic	HLA-DQB1	Intergenic	HLA-DRB5
chr6_32501153_32501446	rs9275224	Intergenic	HLA-DQB1	Intergenic	HLA-DRB5
chr6_32501153_32501446	rs2858332	Intergenic	HLA-DQA2	Intergenic	HLA-DRB5
chr6_32501153_32501446	rs3104402	Intergenic	HLA-DQA2	Intergenic	HLA-DRB5
chr6_32501153_32501446	rs3104405	Intergenic	HLA-DQA2	Intergenic	HLA-DRB5
chr6_32501153_32501446	rs9275601	Intergenic	HLA-DQA2	Intergenic	HLA-DRB5
chr6_32501153_32501446	rs7767167	Intergenic	HLA-DOB	Intergenic	HLA-DRB5
chr6_32501153_32501446	rs151719	intron (NM_002118, intron 3 of 5).2	HLA-DMB	Intergenic	HLA-DRB5
chr6_32510757_32511014	rs204993	intron (NM_002586, intron 4 of 8)	PBX2	Intergenic	HLA-DRB5
chr6_32510757_32511014	rs411326	Intergenic	TSBP1-AS1	Intergenic	HLA-DRB5
chr6_32510757_32511014	rs6932542	Intergenic	BTNL2	Intergenic	HLA-DRB5
chr6_32510757_32511014	rs743862	Intergenic	BTNL2	Intergenic	HLA-DRB5
chr6_32510757_32511014	rs9275224	Intergenic	HLA-DQB1	Intergenic	HLA-DRB5
chr6_32510757_32511014	rs3104402	Intergenic	HLA-DQA2	Intergenic	HLA-DRB5
chr6_32510757_32511014	rs3104405	Intergenic	HLA-DQA2	Intergenic	HLA-DRB5
chr6_32514164_32514539	rs3134931	intron (NM_004557, intron 2 of 29).2	NOTCH4	Intergenic	HLA-DRB5
chr6_32514164_32514539	rs411326	Intergenic	TSBP1-AS1	Intergenic	HLA-DRB5
chr6_32514164_32514539	rs2294884	intron (NM_001304561, intron 4 of 7).5	BTNL2	Intergenic	HLA-DRB5
chr6_32514164_32514539	rs6932542	Intergenic	BTNL2	Intergenic	HLA-DRB5
chr6_32514164_32514539	rs3129882	intron (NM_019111, intron 1 of 4).6	HLA-DRA	Intergenic	HLA-DRB5
chr6_32514164_32514539	rs532098	Intergenic	HLA-DRB1	Intergenic	HLA-DRB5
chr6_32514164_32514539	rs17842183	Intergenic	HLA-DQA1	Intergenic	HLA-DRB5
chr6_32514164_32514539	rs2157051	Intergenic	HLA-DQB1	Intergenic	HLA-DRB5
chr6_32514164_32514539	rs9275224	Intergenic	HLA-DQB1	Intergenic	HLA-DRB5
chr6_32514164_32514539	rs2858332	Intergenic	HLA-DQA2	Intergenic	HLA-DRB5
chr6_32514164_32514539	rs3104402	Intergenic	HLA-DQA2	Intergenic	HLA-DRB5
chr6_32514164_32514539	rs3104405	Intergenic	HLA-DQA2	Intergenic	HLA-DRB5
chr6_32514164_32514539	rs9275601	Intergenic	HLA-DQA2	Intergenic	HLA-DRB5
chr6_32514164_32514539	rs7767167	Intergenic	HLA-DOB	Intergenic	HLA-DRB5
chr6_32514164_32514539	rs151719	intron (NM_002118, intron 3 of 5).2	HLA-DMB	Intergenic	HLA-DRB5
chr6_32514164_32514539	rs3135029	promoter-TSS (NM_006120)	HLA-DMA	Intergenic	HLA-DRB5
chr6_32514164_32514539	rs2284191	intron (NM_002119, intron 1 of 4).7	HLA-DOA	Intergenic	HLA-DRB5
chr6_32518536_32518889	rs411326	Intergenic	TSBP1-AS1	intron (NM_002125, intron 3 of 5)	HLA-DRB5
chr6_32518536_32518889	rs6932542	Intergenic	BTNL2	intron (NM_002125, intron 3 of 5)	HLA-DRB5
chr6_32518536_32518889	rs743862	Intergenic	BTNL2	intron (NM_002125, intron 3 of 5)	HLA-DRB5
chr6_32518536_32518889	rs3129871	Intergenic	HLA-DRA	intron (NM_002125, intron 3 of 5)	HLA-DRB5
chr6_32518536_32518889	rs3129882	intron (NM_019111, intron 1 of 4).6	HLA-DRA	intron (NM_002125, intron 3 of 5)	HLA-DRB5
chr6_32518536_32518889	rs532098	Intergenic	HLA-DRB1	intron (NM_002125, intron 3 of 5)	HLA-DRB5
chr6_32518536_32518889	rs2157051	Intergenic	HLA-DQB1	intron (NM_002125, intron 3 of 5)	HLA-DRB5
chr6_32518536_32518889	rs9275224	Intergenic	HLA-DQB1	intron (NM_002125, intron 3 of 5)	HLA-DRB5
chr6_32518536_32518889	rs3104402	Intergenic	HLA-DQA2	intron (NM_002125, intron 3 of 5)	HLA-DRB5
chr6_32518536_32518889	rs3104405	Intergenic	HLA-DQA2	intron (NM_002125, intron 3 of 5)	HLA-DRB5
chr6_32518536_32518889	rs9275601	Intergenic	HLA-DQA2	intron (NM_002125, intron 3 of 5)	HLA-DRB5
chr6_32518536_32518889	rs7767167	Intergenic	HLA-DOB	intron (NM_002125, intron 3 of 5)	HLA-DRB5
chr6_32518536_32518889	rs151719	intron (NM_002118, intron 3 of 5).2	HLA-DMB	intron (NM_002125, intron 3 of 5)	HLA-DRB5
chr6_32518536_32518889	rs3135029	promoter-TSS (NM_006120)	HLA-DMA	intron (NM_002125, intron 3 of 5)	HLA-DRB5
chr6_32518536_32518889	rs2284191	intron (NM_002119, intron 1 of 4).7	HLA-DOA	intron (NM_002125, intron 3 of 5)	HLA-DRB5
chr6_32522667_32523071	rs3134931	intron (NM_004557, intron 2 of 29).2	NOTCH4	intron (NM_002125, intron 1 of 5)	HLA-DRB5
chr6_32522667_32523071	rs2294884	intron (NM_001304561, intron 4 of 7).5	BTNL2	intron (NM_002125, intron 1 of 5)	HLA-DRB5
chr6_32522667_32523071	rs6932542	Intergenic	BTNL2	intron (NM_002125, intron 1 of 5)	HLA-DRB5
chr6_32522667_32523071	rs743862	Intergenic	BTNL2	intron (NM_002125, intron 1 of 5)	HLA-DRB5
chr6_32522667_32523071	rs3129871	Intergenic	HLA-DRA	intron (NM_002125, intron 1 of 5)	HLA-DRB5
chr6_32522667_32523071	rs532098	Intergenic	HLA-DRB1	intron (NM_002125, intron 1 of 5)	HLA-DRB5
chr6_32522667_32523071	rs17842183	Intergenic	HLA-DQA1	intron (NM_002125, intron 1 of 5)	HLA-DRB5
chr6_32522667_32523071	rs9275224	Intergenic	HLA-DQB1	intron (NM_002125, intron 1 of 5)	HLA-DRB5
chr6_32522667_32523071	rs3104402	Intergenic	HLA-DQA2	intron (NM_002125, intron 1 of 5)	HLA-DRB5
chr6_32522667_32523071	rs3104405	Intergenic	HLA-DQA2	intron (NM_002125, intron 1 of 5)	HLA-DRB5
chr6_32522667_32523071	rs7767167	Intergenic	HLA-DOB	intron (NM_002125, intron 1 of 5)	HLA-DRB5
chr6_32522667_32523071	rs151719	intron (NM_002118, intron 3 of 5).2	HLA-DMB	intron (NM_002125, intron 1 of 5)	HLA-DRB5
chr6_32524049_32524870	rs204993	intron (NM_002586, intron 4 of 8)	PBX2	intron (NM_002125, intron 1 of 5)	HLA-DRB5
chr6_32524049_32524870	rs3134931	intron (NM_004557, intron 2 of 29).2	NOTCH4	intron (NM_002125, intron 1 of 5)	HLA-DRB5
chr6_32524049_32524870	rs411326	Intergenic	TSBP1-AS1	intron (NM_002125, intron 1 of 5)	HLA-DRB5
chr6_32524049_32524870	rs6932542	Intergenic	BTNL2	intron (NM_002125, intron 1 of 5)	HLA-DRB5
chr6_32524049_32524870	rs743862	Intergenic	BTNL2	intron (NM_002125, intron 1 of 5)	HLA-DRB5
chr6_32524049_32524870	rs3129871	Intergenic	HLA-DRA	intron (NM_002125, intron 1 of 5)	HLA-DRB5
chr6_32524049_32524870	rs3129882	intron (NM_019111, intron 1 of 4).6	HLA-DRA	intron (NM_002125, intron 1 of 5)	HLA-DRB5
chr6_32524049_32524870	rs3129890	Intergenic	HLA-DRA	intron (NM_002125, intron 1 of 5)	HLA-DRB5
chr6_32524049_32524870	rs532098	Intergenic	HLA-DRB1	intron (NM_002125, intron 1 of 5)	HLA-DRB5
chr6_32524049_32524870	rs17842183	Intergenic	HLA-DQA1	intron (NM_002125, intron 1 of 5)	HLA-DRB5
chr6_32524049_32524870	rs9275224	Intergenic	HLA-DQB1	intron (NM_002125, intron 1 of 5)	HLA-DRB5
chr6_32524049_32524870	rs3104402	Intergenic	HLA-DQA2	intron (NM_002125, intron 1 of 5)	HLA-DRB5
chr6_32524049_32524870	rs3104405	Intergenic	HLA-DQA2	intron (NM_002125, intron 1 of 5)	HLA-DRB5
chr6_32524049_32524870	rs9275601	Intergenic	HLA-DQA2	intron (NM_002125, intron 1 of 5)	HLA-DRB5
chr6_32524049_32524870	rs7767167	Intergenic	HLA-DOB	intron (NM_002125, intron 1 of 5)	HLA-DRB5
chr6_32524049_32524870	rs4713600	intron (NM_002800, intron 1 of 5).5	PSMB9	intron (NM_002125, intron 1 of 5)	HLA-DRB5
chr6_32524049_32524870	rs151719	intron (NM_002118, intron 3 of 5).2	HLA-DMB	intron (NM_002125, intron 1 of 5)	HLA-DRB5
chr6_32525988_32526141	rs3134954	intron (NM_019105, intron 1 of 43)	TNXB	intron (NM_002125, intron 1 of 5)	HLA-DRB5
chr6_32525988_32526141	rs3134931	intron (NM_004557, intron 2 of 29).2	NOTCH4	intron (NM_002125, intron 1 of 5)	HLA-DRB5
chr6_32525988_32526141	rs411326	Intergenic	TSBP1-AS1	intron (NM_002125, intron 1 of 5)	HLA-DRB5
chr6_32525988_32526141	rs6932542	Intergenic	BTNL2	intron (NM_002125, intron 1 of 5)	HLA-DRB5
chr6_32525988_32526141	rs743862	Intergenic	BTNL2	intron (NM_002125, intron 1 of 5)	HLA-DRB5
chr6_32525988_32526141	rs3129882	intron (NM_019111, intron 1 of 4).6	HLA-DRA	intron (NM_002125, intron 1 of 5)	HLA-DRB5
chr6_32525988_32526141	rs532098	Intergenic	HLA-DRB1	intron (NM_002125, intron 1 of 5)	HLA-DRB5
chr6_32525988_32526141	rs17842183	Intergenic	HLA-DQA1	intron (NM_002125, intron 1 of 5)	HLA-DRB5
chr6_32525988_32526141	rs2157051	Intergenic	HLA-DQB1	intron (NM_002125, intron 1 of 5)	HLA-DRB5
chr6_32525988_32526141	rs3104402	Intergenic	HLA-DQA2	intron (NM_002125, intron 1 of 5)	HLA-DRB5
chr6_32525988_32526141	rs9275601	Intergenic	HLA-DQA2	intron (NM_002125, intron 1 of 5)	HLA-DRB5
chr6_32525988_32526141	rs7767167	Intergenic	HLA-DOB	intron (NM_002125, intron 1 of 5)	HLA-DRB5
chr6_32525988_32526141	rs151719	intron (NM_002118, intron 3 of 5).2	HLA-DMB	intron (NM_002125, intron 1 of 5)	HLA-DRB5
chr6_32528094_32528550	rs1150754	intron (NM_019105, intron 8 of 43)	TNXB	intron (NM_002125, intron 1 of 5)	HLA-DRB5
chr6_32528094_32528550	rs3134954	intron (NM_019105, intron 1 of 43)	TNXB	intron (NM_002125, intron 1 of 5)	HLA-DRB5
chr6_32528094_32528550	rs204993	intron (NM_002586, intron 4 of 8)	PBX2	intron (NM_002125, intron 1 of 5)	HLA-DRB5
chr6_32528094_32528550	rs3134931	intron (NM_004557, intron 2 of 29).2	NOTCH4	intron (NM_002125, intron 1 of 5)	HLA-DRB5
chr6_32528094_32528550	rs411326	Intergenic	TSBP1-AS1	intron (NM_002125, intron 1 of 5)	HLA-DRB5
chr6_32528094_32528550	rs6932542	Intergenic	BTNL2	intron (NM_002125, intron 1 of 5)	HLA-DRB5
chr6_32528094_32528550	rs743862	Intergenic	BTNL2	intron (NM_002125, intron 1 of 5)	HLA-DRB5
chr6_32528094_32528550	rs3129882	intron (NM_019111, intron 1 of 4).6	HLA-DRA	intron (NM_002125, intron 1 of 5)	HLA-DRB5
chr6_32528094_32528550	rs532098	Intergenic	HLA-DRB1	intron (NM_002125, intron 1 of 5)	HLA-DRB5
chr6_32528094_32528550	rs17842183	Intergenic	HLA-DQA1	intron (NM_002125, intron 1 of 5)	HLA-DRB5
chr6_32528094_32528550	rs2157051	Intergenic	HLA-DQB1	intron (NM_002125, intron 1 of 5)	HLA-DRB5
chr6_32528094_32528550	rs9275224	Intergenic	HLA-DQB1	intron (NM_002125, intron 1 of 5)	HLA-DRB5
chr6_32528094_32528550	rs3104402	Intergenic	HLA-DQA2	intron (NM_002125, intron 1 of 5)	HLA-DRB5
chr6_32528094_32528550	rs3104405	Intergenic	HLA-DQA2	intron (NM_002125, intron 1 of 5)	HLA-DRB5
chr6_32528094_32528550	rs9275601	Intergenic	HLA-DQA2	intron (NM_002125, intron 1 of 5)	HLA-DRB5
chr6_32528094_32528550	rs7767167	Intergenic	HLA-DOB	intron (NM_002125, intron 1 of 5)	HLA-DRB5
chr6_32528094_32528550	rs151719	intron (NM_002118, intron 3 of 5).2	HLA-DMB	intron (NM_002125, intron 1 of 5)	HLA-DRB5
chr6_32530827_32531271	rs1150754	intron (NM_019105, intron 8 of 43)	TNXB	promoter-TSS (NM_002125)	HLA-DRB5
chr6_32530827_32531271	rs3134954	intron (NM_019105, intron 1 of 43)	TNXB	promoter-TSS (NM_002125)	HLA-DRB5
chr6_32530827_32531271	rs411326	Intergenic	TSBP1-AS1	promoter-TSS (NM_002125)	HLA-DRB5
chr6_32530827_32531271	rs6932542	Intergenic	BTNL2	promoter-TSS (NM_002125)	HLA-DRB5
chr6_32530827_32531271	rs743862	Intergenic	BTNL2	promoter-TSS (NM_002125)	HLA-DRB5
chr6_32530827_32531271	rs3129882	intron (NM_019111, intron 1 of 4).6	HLA-DRA	promoter-TSS (NM_002125)	HLA-DRB5
chr6_32530827_32531271	rs3129890	Intergenic	HLA-DRA	promoter-TSS (NM_002125)	HLA-DRB5
chr6_32530827_32531271	rs532098	Intergenic	HLA-DRB1	promoter-TSS (NM_002125)	HLA-DRB5
chr6_32530827_32531271	rs2157051	Intergenic	HLA-DQB1	promoter-TSS (NM_002125)	HLA-DRB5
chr6_32530827_32531271	rs9275224	Intergenic	HLA-DQB1	promoter-TSS (NM_002125)	HLA-DRB5
chr6_32530827_32531271	rs3104402	Intergenic	HLA-DQA2	promoter-TSS (NM_002125)	HLA-DRB5
chr6_32530827_32531271	rs3104405	Intergenic	HLA-DQA2	promoter-TSS (NM_002125)	HLA-DRB5
chr6_32530827_32531271	rs9275601	Intergenic	HLA-DQA2	promoter-TSS (NM_002125)	HLA-DRB5
chr6_32530827_32531271	rs7767167	Intergenic	HLA-DOB	promoter-TSS (NM_002125)	HLA-DRB5
chr6_32530827_32531271	rs4713600	intron (NM_002800, intron 1 of 5).5	PSMB9	promoter-TSS (NM_002125)	HLA-DRB5
chr6_32530827_32531271	rs151719	intron (NM_002118, intron 3 of 5).2	HLA-DMB	promoter-TSS (NM_002125)	HLA-DRB5
chr6_32530827_32531271	rs2284191	intron (NM_002119, intron 1 of 4).7	HLA-DOA	promoter-TSS (NM_002125)	HLA-DRB5
chr6_32533156_32533758	rs1150754	intron (NM_019105, intron 8 of 43)	TNXB	Intergenic	HLA-DRB5
chr6_32533156_32533758	rs411326	Intergenic	TSBP1-AS1	Intergenic	HLA-DRB5
chr6_32533156_32533758	rs6932542	Intergenic	BTNL2	Intergenic	HLA-DRB5
chr6_32533156_32533758	rs3129882	intron (NM_019111, intron 1 of 4).6	HLA-DRA	Intergenic	HLA-DRB5
chr6_32533156_32533758	rs532098	Intergenic	HLA-DRB1	Intergenic	HLA-DRB5
chr6_32533156_32533758	rs17842183	Intergenic	HLA-DQA1	Intergenic	HLA-DRB5
chr6_32533156_32533758	rs9275224	Intergenic	HLA-DQB1	Intergenic	HLA-DRB5
chr6_32533156_32533758	rs3104405	Intergenic	HLA-DQA2	Intergenic	HLA-DRB5
chr6_32533156_32533758	rs9275601	Intergenic	HLA-DQA2	Intergenic	HLA-DRB5
chr6_32533156_32533758	rs151719	intron (NM_002118, intron 3 of 5).2	HLA-DMB	Intergenic	HLA-DRB5
chr6_32534320_32534555	rs1150754	intron (NM_019105, intron 8 of 43)	TNXB	Intergenic	HLA-DRB5
chr6_32534320_32534555	rs411326	Intergenic	TSBP1-AS1	Intergenic	HLA-DRB5
chr6_32534320_32534555	rs6932542	Intergenic	BTNL2	Intergenic	HLA-DRB5
chr6_32534320_32534555	rs743862	Intergenic	BTNL2	Intergenic	HLA-DRB5
chr6_32534320_32534555	rs660895	Intergenic	HLA-DRB1	Intergenic	HLA-DRB5
chr6_32534320_32534555	rs532098	Intergenic	HLA-DRB1	Intergenic	HLA-DRB5
chr6_32534320_32534555	rs17842183	Intergenic	HLA-DQA1	Intergenic	HLA-DRB5
chr6_32534320_32534555	rs9275224	Intergenic	HLA-DQB1	Intergenic	HLA-DRB5
chr6_32534320_32534555	rs3104402	Intergenic	HLA-DQA2	Intergenic	HLA-DRB5
chr6_32534320_32534555	rs3104405	Intergenic	HLA-DQA2	Intergenic	HLA-DRB5
chr6_32534320_32534555	rs9275602	Intergenic	HLA-DQA2	Intergenic	HLA-DRB5
chr6_32534320_32534555	rs4713600	intron (NM_002800, intron 1 of 5).5	PSMB9	Intergenic	HLA-DRB5
chr6_32534615_32534640	rs204993	intron (NM_002586, intron 4 of 8)	PBX2	Intergenic	HLA-DRB5
chr6_32534615_32534640	rs411326	Intergenic	TSBP1-AS1	Intergenic	HLA-DRB5
chr6_32534615_32534640	rs6932542	Intergenic	BTNL2	Intergenic	HLA-DRB5
chr6_32534615_32534640	rs743862	Intergenic	BTNL2	Intergenic	HLA-DRB5
chr6_32534615_32534640	rs3129882	intron (NM_019111, intron 1 of 4).6	HLA-DRA	Intergenic	HLA-DRB5
chr6_32534615_32534640	rs532098	Intergenic	HLA-DRB1	Intergenic	HLA-DRB5
chr6_32534615_32534640	rs17842183	Intergenic	HLA-DQA1	Intergenic	HLA-DRB5
chr6_32534615_32534640	rs9275224	Intergenic	HLA-DQB1	Intergenic	HLA-DRB5
chr6_32534615_32534640	rs3104402	Intergenic	HLA-DQA2	Intergenic	HLA-DRB5
chr6_32534615_32534640	rs3104405	Intergenic	HLA-DQA2	Intergenic	HLA-DRB5
chr6_32534615_32534640	rs9275601	Intergenic	HLA-DQA2	Intergenic	HLA-DRB5
chr6_32534615_32534640	rs151719	intron (NM_002118, intron 3 of 5).2	HLA-DMB	Intergenic	HLA-DRB5
chr6_32534615_32534640	rs2284191	intron (NM_002119, intron 1 of 4).7	HLA-DOA	Intergenic	HLA-DRB5
chr6_32534967_32535185	rs743862	Intergenic	BTNL2	Intergenic	HLA-DRB5
chr6_32534967_32535185	rs9275601	Intergenic	HLA-DQA2	Intergenic	HLA-DRB5
chr6_32535314_32535799	rs411326	Intergenic	TSBP1-AS1	Intergenic	HLA-DRB5
chr6_32535314_32535799	rs6932542	Intergenic	BTNL2	Intergenic	HLA-DRB5
chr6_32535314_32535799	rs743862	Intergenic	BTNL2	Intergenic	HLA-DRB5
chr6_32535314_32535799	rs3129890	Intergenic	HLA-DRA	Intergenic	HLA-DRB5
chr6_32535314_32535799	rs9275224	Intergenic	HLA-DQB1	Intergenic	HLA-DRB5
chr6_32535314_32535799	rs2858332	Intergenic	HLA-DQA2	Intergenic	HLA-DRB5
chr6_32535314_32535799	rs3104402	Intergenic	HLA-DQA2	Intergenic	HLA-DRB5
chr6_32535314_32535799	rs3104405	Intergenic	HLA-DQA2	Intergenic	HLA-DRB5
chr6_32535314_32535799	rs9275601	Intergenic	HLA-DQA2	Intergenic	HLA-DRB5
chr6_32535314_32535799	rs4713600	intron (NM_002800, intron 1 of 5).5	PSMB9	Intergenic	HLA-DRB5
chr6_32536976_32537799	rs411326	Intergenic	TSBP1-AS1	Intergenic	HLA-DRB5
chr6_32536976_32537799	rs6932542	Intergenic	BTNL2	Intergenic	HLA-DRB5
chr6_32536976_32537799	rs743862	Intergenic	BTNL2	Intergenic	HLA-DRB5
chr6_32536976_32537799	rs660895	Intergenic	HLA-DRB1	Intergenic	HLA-DRB5
chr6_32536976_32537799	rs532098	Intergenic	HLA-DRB1	Intergenic	HLA-DRB5
chr6_32536976_32537799	rs17842183	Intergenic	HLA-DQA1	Intergenic	HLA-DRB5
chr6_32536976_32537799	rs9275224	Intergenic	HLA-DQB1	Intergenic	HLA-DRB5
chr6_32536976_32537799	rs2858332	Intergenic	HLA-DQA2	Intergenic	HLA-DRB5
chr6_32536976_32537799	rs3104402	Intergenic	HLA-DQA2	Intergenic	HLA-DRB5
chr6_32536976_32537799	rs3104405	Intergenic	HLA-DQA2	Intergenic	HLA-DRB5
chr6_32536976_32537799	rs9275601	Intergenic	HLA-DQA2	Intergenic	HLA-DRB5
chr6_32536976_32537799	rs151719	intron (NM_002118, intron 3 of 5).2	HLA-DMB	Intergenic	HLA-DRB5
chr6_32539057_32539166	rs2269425	intron (NR_037861, intron 4 of 15)	LOC100507547	Intergenic	HLA-DRB5
chr6_32539057_32539166	rs411326	Intergenic	TSBP1-AS1	Intergenic	HLA-DRB5
chr6_32539057_32539166	rs1265759	intron (NM_006781, intron 8 of 22)	TSBP1	Intergenic	HLA-DRB5
chr6_32539057_32539166	rs9268365	intron (NM_001286475, intron 5 of 23).3	TSBP1	Intergenic	HLA-DRB5
chr6_32539057_32539166	rs6932542	Intergenic	BTNL2	Intergenic	HLA-DRB5
chr6_32539057_32539166	rs743862	Intergenic	BTNL2	Intergenic	HLA-DRB5
chr6_32539057_32539166	rs3129871	Intergenic	HLA-DRA	Intergenic	HLA-DRB5
chr6_32539057_32539166	rs3129890	Intergenic	HLA-DRA	Intergenic	HLA-DRB5
chr6_32539057_32539166	rs532098	Intergenic	HLA-DRB1	Intergenic	HLA-DRB5
chr6_32539057_32539166	rs17842183	Intergenic	HLA-DQA1	Intergenic	HLA-DRB5
chr6_32539057_32539166	rs9275224	Intergenic	HLA-DQB1	Intergenic	HLA-DRB5
chr6_32539057_32539166	rs2858332	Intergenic	HLA-DQA2	Intergenic	HLA-DRB5
chr6_32539057_32539166	rs3104402	Intergenic	HLA-DQA2	Intergenic	HLA-DRB5
chr6_32539057_32539166	rs3104405	Intergenic	HLA-DQA2	Intergenic	HLA-DRB5
chr6_32539057_32539166	rs9275601	Intergenic	HLA-DQA2	Intergenic	HLA-DRB5
chr6_32539057_32539166	rs7767167	Intergenic	HLA-DOB	Intergenic	HLA-DRB5
chr6_32539057_32539166	rs4713600	intron (NM_002800, intron 1 of 5).5	PSMB9	Intergenic	HLA-DRB5
chr6_32539057_32539166	rs2284191	intron (NM_002119, intron 1 of 4).7	HLA-DOA	Intergenic	HLA-DRB5
chr6_32539703_32539829	rs3134954	intron (NM_019105, intron 1 of 43)	TNXB	Intergenic	HLA-DRB5
chr6_32539703_32539829	rs743862	Intergenic	BTNL2	Intergenic	HLA-DRB5
chr6_32539703_32539829	rs3129882	intron (NM_019111, intron 1 of 4).6	HLA-DRA	Intergenic	HLA-DRB5
chr6_32539703_32539829	rs532098	Intergenic	HLA-DRB1	Intergenic	HLA-DRB5
chr6_32539703_32539829	rs17842183	Intergenic	HLA-DQA1	Intergenic	HLA-DRB5
chr6_32539703_32539829	rs2157051	Intergenic	HLA-DQB1	Intergenic	HLA-DRB5
chr6_32539703_32539829	rs9275224	Intergenic	HLA-DQB1	Intergenic	HLA-DRB5
chr6_32539703_32539829	rs3104402	Intergenic	HLA-DQA2	Intergenic	HLA-DRB5
chr6_32539703_32539829	rs3104405	Intergenic	HLA-DQA2	Intergenic	HLA-DRB5
chr6_32539703_32539829	rs9275601	Intergenic	HLA-DQA2	Intergenic	HLA-DRB5
chr6_32539703_32539829	rs7767167	Intergenic	HLA-DOB	Intergenic	HLA-DRB5
chr6_32539703_32539829	rs4713600	intron (NM_002800, intron 1 of 5).5	PSMB9	Intergenic	HLA-DRB5
chr6_32539703_32539829	rs151719	intron (NM_002118, intron 3 of 5).2	HLA-DMB	Intergenic	HLA-DRB5
chr6_32540161_32540339	rs204993	intron (NM_002586, intron 4 of 8)	PBX2	Intergenic	HLA-DRB5
chr6_32540161_32540339	rs532098	Intergenic	HLA-DRB1	Intergenic	HLA-DRB5
chr6_32540161_32540339	rs9275224	Intergenic	HLA-DQB1	Intergenic	HLA-DRB5
chr6_32540161_32540339	rs3104405	Intergenic	HLA-DQA2	Intergenic	HLA-DRB5
chr6_32540161_32540339	rs9275602	Intergenic	HLA-DQA2	Intergenic	HLA-DRB5
chr6_32540161_32540339	rs4713600	intron (NM_002800, intron 1 of 5).5	PSMB9	Intergenic	HLA-DRB5
chr6_32540161_32540339	rs151719	intron (NM_002118, intron 3 of 5).2	HLA-DMB	Intergenic	HLA-DRB5
chr6_32543751_32544442	rs204993	intron (NM_002586, intron 4 of 8)	PBX2	Intergenic	HLA-DRB5
chr6_32543751_32544442	rs6932542	Intergenic	BTNL2	Intergenic	HLA-DRB5
chr6_32543751_32544442	rs3129871	Intergenic	HLA-DRA	Intergenic	HLA-DRB5
chr6_32543751_32544442	rs3129882	intron (NM_019111, intron 1 of 4).6	HLA-DRA	Intergenic	HLA-DRB5
chr6_32543751_32544442	rs532098	Intergenic	HLA-DRB1	Intergenic	HLA-DRB5
chr6_32543751_32544442	rs17842183	Intergenic	HLA-DQA1	Intergenic	HLA-DRB5
chr6_32543751_32544442	rs9275224	Intergenic	HLA-DQB1	Intergenic	HLA-DRB5
chr6_32543751_32544442	rs3104402	Intergenic	HLA-DQA2	Intergenic	HLA-DRB5
chr6_32543751_32544442	rs3104405	Intergenic	HLA-DQA2	Intergenic	HLA-DRB5
chr6_32543751_32544442	rs9275602	Intergenic	HLA-DQA2	Intergenic	HLA-DRB5
chr6_32543751_32544442	rs4713600	intron (NM_002800, intron 1 of 5).5	PSMB9	Intergenic	HLA-DRB5
chr6_32543751_32544442	rs3135029	promoter-TSS (NM_006120)	HLA-DMA	Intergenic	HLA-DRB5
chr6_32544756_32545082	rs204993	intron (NM_002586, intron 4 of 8)	PBX2	Intergenic	HLA-DRB5
chr6_32544756_32545082	rs743862	Intergenic	BTNL2	Intergenic	HLA-DRB5
chr6_32544756_32545082	rs660895	Intergenic	HLA-DRB1	Intergenic	HLA-DRB5
chr6_32544756_32545082	rs532098	Intergenic	HLA-DRB1	Intergenic	HLA-DRB5
chr6_32544756_32545082	rs4713600	intron (NM_002800, intron 1 of 5).5	PSMB9	Intergenic	HLA-DRB5
chr6_32544756_32545082	rs154978	Intergenic	HLA-DMB	Intergenic	HLA-DRB5
chr6_32544756_32545082	rs3135029	promoter-TSS (NM_006120)	HLA-DMA	Intergenic	HLA-DRB5
chr6_32545600_32546249	rs204993	intron (NM_002586, intron 4 of 8)	PBX2	Intergenic	HLA-DRB6
chr6_32545600_32546249	rs6932542	Intergenic	BTNL2	Intergenic	HLA-DRB6
chr6_32545600_32546249	rs743862	Intergenic	BTNL2	Intergenic	HLA-DRB6
chr6_32545600_32546249	rs9275224	Intergenic	HLA-DQB1	Intergenic	HLA-DRB6
chr6_32545600_32546249	rs3104405	Intergenic	HLA-DQA2	Intergenic	HLA-DRB6
chr6_32545600_32546249	rs4713600	intron (NM_002800, intron 1 of 5).5	PSMB9	Intergenic	HLA-DRB6
chr6_32545600_32546249	rs154978	Intergenic	HLA-DMB	Intergenic	HLA-DRB6
chr6_32548552_32548590	rs411326	Intergenic	TSBP1-AS1	Intergenic	HLA-DRB6
chr6_32548552_32548590	rs743862	Intergenic	BTNL2	Intergenic	HLA-DRB6
chr6_32548552_32548590	rs3129882	intron (NM_019111, intron 1 of 4).6	HLA-DRA	Intergenic	HLA-DRB6
chr6_32548552_32548590	rs3129890	Intergenic	HLA-DRA	Intergenic	HLA-DRB6
chr6_32548552_32548590	rs532098	Intergenic	HLA-DRB1	Intergenic	HLA-DRB6
chr6_32548552_32548590	rs17842183	Intergenic	HLA-DQA1	Intergenic	HLA-DRB6
chr6_32548552_32548590	rs9275224	Intergenic	HLA-DQB1	Intergenic	HLA-DRB6
chr6_32548552_32548590	rs3104402	Intergenic	HLA-DQA2	Intergenic	HLA-DRB6
chr6_32548552_32548590	rs3104405	Intergenic	HLA-DQA2	Intergenic	HLA-DRB6
chr6_32548552_32548590	rs9275601	Intergenic	HLA-DQA2	Intergenic	HLA-DRB6
chr6_32548552_32548590	rs151719	intron (NM_002118, intron 3 of 5).2	HLA-DMB	Intergenic	HLA-DRB6
chr6_32548552_32548590	rs2284191	intron (NM_002119, intron 1 of 4).7	HLA-DOA	Intergenic	HLA-DRB6
chr6_32549470_32549672	rs6932542	Intergenic	BTNL2	Intergenic	HLA-DRB6
chr6_32549470_32549672	rs3104402	Intergenic	HLA-DQA2	Intergenic	HLA-DRB6
chr6_32549470_32549672	rs9275602	Intergenic	HLA-DQA2	Intergenic	HLA-DRB6
chr6_32549470_32549672	rs151719	intron (NM_002118, intron 3 of 5).2	HLA-DMB	Intergenic	HLA-DRB6
chr6_32550212_32550384	rs743862	Intergenic	BTNL2	Intergenic	HLA-DRB6
chr6_32550591_32550628	rs743862	Intergenic	BTNL2	Intergenic	HLA-DRB6
chr6_32550591_32550628	rs17842183	Intergenic	HLA-DQA1	Intergenic	HLA-DRB6
chr6_32550591_32550628	rs9275601	Intergenic	HLA-DQA2	Intergenic	HLA-DRB6
chr6_32550591_32550628	rs4713600	intron (NM_002800, intron 1 of 5).5	PSMB9	Intergenic	HLA-DRB6
chr6_32550591_32550628	rs151719	intron (NM_002118, intron 3 of 5).2	HLA-DMB	Intergenic	HLA-DRB6
chr6_32551781_32551949	rs204993	intron (NM_002586, intron 4 of 8)	PBX2	TTS (NR_001298)	HLA-DRB6
chr6_32551781_32551949	rs743862	Intergenic	BTNL2	TTS (NR_001298)	HLA-DRB6
chr6_32551781_32551949	rs532098	Intergenic	HLA-DRB1	TTS (NR_001298)	HLA-DRB6
chr6_32551781_32551949	rs17842183	Intergenic	HLA-DQA1	TTS (NR_001298)	HLA-DRB6
chr6_32551781_32551949	rs9275224	Intergenic	HLA-DQB1	TTS (NR_001298)	HLA-DRB6
chr6_32551781_32551949	rs3104402	Intergenic	HLA-DQA2	TTS (NR_001298)	HLA-DRB6
chr6_32551781_32551949	rs3104405	Intergenic	HLA-DQA2	TTS (NR_001298)	HLA-DRB6
chr6_32551781_32551949	rs9275601	Intergenic	HLA-DQA2	TTS (NR_001298)	HLA-DRB6
chr6_32551781_32551949	rs7767167	Intergenic	HLA-DOB	TTS (NR_001298)	HLA-DRB6
chr6_32551781_32551949	rs4713600	intron (NM_002800, intron 1 of 5).5	PSMB9	TTS (NR_001298)	HLA-DRB6
chr6_32551781_32551949	rs151719	intron (NM_002118, intron 3 of 5).2	HLA-DMB	TTS (NR_001298)	HLA-DRB6
chr6_32553638_32553923	rs404860	intron (NM_004557, intron 11 of 29).2	NOTCH4	intron (NR_001298, intron 4 of 5)	HLA-DRB6
chr6_32553638_32553923	rs2294884	intron (NM_001304561, intron 4 of 7).5	BTNL2	intron (NR_001298, intron 4 of 5)	HLA-DRB6
chr6_32553638_32553923	rs6932542	Intergenic	BTNL2	intron (NR_001298, intron 4 of 5)	HLA-DRB6
chr6_32553638_32553923	rs743862	Intergenic	BTNL2	intron (NR_001298, intron 4 of 5)	HLA-DRB6
chr6_32553638_32553923	rs3129882	intron (NM_019111, intron 1 of 4).6	HLA-DRA	intron (NR_001298, intron 4 of 5)	HLA-DRB6
chr6_32553638_32553923	rs532098	Intergenic	HLA-DRB1	intron (NR_001298, intron 4 of 5)	HLA-DRB6
chr6_32553638_32553923	rs17842183	Intergenic	HLA-DQA1	intron (NR_001298, intron 4 of 5)	HLA-DRB6
chr6_32553638_32553923	rs9275224	Intergenic	HLA-DQB1	intron (NR_001298, intron 4 of 5)	HLA-DRB6
chr6_32553638_32553923	rs2858332	Intergenic	HLA-DQA2	intron (NR_001298, intron 4 of 5)	HLA-DRB6
chr6_32553638_32553923	rs3104402	Intergenic	HLA-DQA2	intron (NR_001298, intron 4 of 5)	HLA-DRB6
chr6_32553638_32553923	rs7767167	Intergenic	HLA-DOB	intron (NR_001298, intron 4 of 5)	HLA-DRB6
chr6_32553638_32553923	rs151719	intron (NM_002118, intron 3 of 5).2	HLA-DMB	intron (NR_001298, intron 4 of 5)	HLA-DRB6
chr6_32553638_32553923	rs2284191	intron (NM_002119, intron 1 of 4).7	HLA-DOA	intron (NR_001298, intron 4 of 5)	HLA-DRB6
chr6_32554429_32555206	rs411326	Intergenic	TSBP1-AS1	non-coding (NR_001298, exon 3 of 6)	HLA-DRB6
chr6_32554429_32555206	rs3104402	Intergenic	HLA-DQA2	non-coding (NR_001298, exon 3 of 6)	HLA-DRB6
chr6_32554429_32555206	rs9275601	Intergenic	HLA-DQA2	non-coding (NR_001298, exon 3 of 6)	HLA-DRB6
chr6_32554429_32555206	rs4713600	intron (NM_002800, intron 1 of 5).5	PSMB9	non-coding (NR_001298, exon 3 of 6)	HLA-DRB6
chr6_32554429_32555206	rs151719	intron (NM_002118, intron 3 of 5).2	HLA-DMB	non-coding (NR_001298, exon 3 of 6)	HLA-DRB6
chr6_32555359_32555783	rs2269425	intron (NR_037861, intron 4 of 15)	LOC100507547	intron (NR_001298, intron 2 of 5)	HLA-DRB6
chr6_32555359_32555783	rs411326	Intergenic	TSBP1-AS1	intron (NR_001298, intron 2 of 5)	HLA-DRB6
chr6_32555359_32555783	rs6932542	Intergenic	BTNL2	intron (NR_001298, intron 2 of 5)	HLA-DRB6
chr6_32555359_32555783	rs743862	Intergenic	BTNL2	intron (NR_001298, intron 2 of 5)	HLA-DRB6
chr6_32555359_32555783	rs532098	Intergenic	HLA-DRB1	intron (NR_001298, intron 2 of 5)	HLA-DRB6
chr6_32555359_32555783	rs17842183	Intergenic	HLA-DQA1	intron (NR_001298, intron 2 of 5)	HLA-DRB6
chr6_32555359_32555783	rs3104402	Intergenic	HLA-DQA2	intron (NR_001298, intron 2 of 5)	HLA-DRB6
chr6_32555359_32555783	rs3104405	Intergenic	HLA-DQA2	intron (NR_001298, intron 2 of 5)	HLA-DRB6
chr6_32555359_32555783	rs7767167	Intergenic	HLA-DOB	intron (NR_001298, intron 2 of 5)	HLA-DRB6
chr6_32555359_32555783	rs151719	intron (NM_002118, intron 3 of 5).2	HLA-DMB	intron (NR_001298, intron 2 of 5)	HLA-DRB6
chr6_32558479_32558659	rs411326	Intergenic	TSBP1-AS1	intron (NR_001298, intron 1 of 5)	HLA-DRB6
chr6_32558479_32558659	rs9275224	Intergenic	HLA-DQB1	intron (NR_001298, intron 1 of 5)	HLA-DRB6
chr6_32558479_32558659	rs3104402	Intergenic	HLA-DQA2	intron (NR_001298, intron 1 of 5)	HLA-DRB6
chr6_32558479_32558659	rs9275601	Intergenic	HLA-DQA2	intron (NR_001298, intron 1 of 5)	HLA-DRB6
chr6_32558833_32559458	rs1150754	intron (NM_019105, intron 8 of 43)	TNXB	intron (NR_001298, intron 1 of 5)	HLA-DRB6
chr6_32558833_32559458	rs2269425	intron (NR_037861, intron 4 of 15)	LOC100507547	intron (NR_001298, intron 1 of 5)	HLA-DRB6
chr6_32558833_32559458	rs411326	Intergenic	TSBP1-AS1	intron (NR_001298, intron 1 of 5)	HLA-DRB6
chr6_32558833_32559458	rs6932542	Intergenic	BTNL2	intron (NR_001298, intron 1 of 5)	HLA-DRB6
chr6_32558833_32559458	rs743862	Intergenic	BTNL2	intron (NR_001298, intron 1 of 5)	HLA-DRB6
chr6_32558833_32559458	rs3129871	Intergenic	HLA-DRA	intron (NR_001298, intron 1 of 5)	HLA-DRB6
chr6_32558833_32559458	rs3129882	intron (NM_019111, intron 1 of 4).6	HLA-DRA	intron (NR_001298, intron 1 of 5)	HLA-DRB6
chr6_32558833_32559458	rs660895	Intergenic	HLA-DRB1	intron (NR_001298, intron 1 of 5)	HLA-DRB6
chr6_32558833_32559458	rs532098	Intergenic	HLA-DRB1	intron (NR_001298, intron 1 of 5)	HLA-DRB6
chr6_32558833_32559458	rs9275224	Intergenic	HLA-DQB1	intron (NR_001298, intron 1 of 5)	HLA-DRB6
chr6_32558833_32559458	rs3104402	Intergenic	HLA-DQA2	intron (NR_001298, intron 1 of 5)	HLA-DRB6
chr6_32558833_32559458	rs3104405	Intergenic	HLA-DQA2	intron (NR_001298, intron 1 of 5)	HLA-DRB6
chr6_32558833_32559458	rs9275601	Intergenic	HLA-DQA2	intron (NR_001298, intron 1 of 5)	HLA-DRB6
chr6_32558833_32559458	rs151719	intron (NM_002118, intron 3 of 5).2	HLA-DMB	intron (NR_001298, intron 1 of 5)	HLA-DRB6
chr6_32563339_32565354	rs1150754	intron (NM_019105, intron 8 of 43)	TNXB	Intergenic	HLA-DRB6
chr6_32563339_32565354	rs411326	Intergenic	TSBP1-AS1	Intergenic	HLA-DRB6
chr6_32563339_32565354	rs743862	Intergenic	BTNL2	Intergenic	HLA-DRB6
chr6_32563339_32565354	rs3129890	Intergenic	HLA-DRA	Intergenic	HLA-DRB6
chr6_32563339_32565354	rs17842183	Intergenic	HLA-DQA1	Intergenic	HLA-DRB6
chr6_32563339_32565354	rs9275224	Intergenic	HLA-DQB1	Intergenic	HLA-DRB6
chr6_32563339_32565354	rs3104402	Intergenic	HLA-DQA2	Intergenic	HLA-DRB6
chr6_32563339_32565354	rs9275601	Intergenic	HLA-DQA2	Intergenic	HLA-DRB6
chr6_32563339_32565354	rs151719	intron (NM_002118, intron 3 of 5).2	HLA-DMB	Intergenic	HLA-DRB6
chr6_32563339_32565354	rs2284191	intron (NM_002119, intron 1 of 4).7	HLA-DOA	Intergenic	HLA-DRB6
chr6_32565750_32567186	rs1150754	intron (NM_019105, intron 8 of 43)	TNXB	Intergenic	HLA-DRB6
chr6_32565750_32567186	rs204993	intron (NM_002586, intron 4 of 8)	PBX2	Intergenic	HLA-DRB6
chr6_32565750_32567186	rs743862	Intergenic	BTNL2	Intergenic	HLA-DRB6
chr6_32565750_32567186	rs3129882	intron (NM_019111, intron 1 of 4).6	HLA-DRA	Intergenic	HLA-DRB6
chr6_32565750_32567186	rs9275224	Intergenic	HLA-DQB1	Intergenic	HLA-DRB6
chr6_32565750_32567186	rs3104405	Intergenic	HLA-DQA2	Intergenic	HLA-DRB6
chr6_32565750_32567186	rs9275601	Intergenic	HLA-DQA2	Intergenic	HLA-DRB6
chr6_32565750_32567186	rs4713600	intron (NM_002800, intron 1 of 5).5	PSMB9	Intergenic	HLA-DRB6
chr6_32570472_32570779	rs3134931	intron (NM_004557, intron 2 of 29).2	NOTCH4	Intergenic	HLA-DRB6
chr6_32570472_32570779	rs411326	Intergenic	TSBP1-AS1	Intergenic	HLA-DRB6
chr6_32570472_32570779	rs2294884	intron (NM_001304561, intron 4 of 7).5	BTNL2	Intergenic	HLA-DRB6
chr6_32570472_32570779	rs6932542	Intergenic	BTNL2	Intergenic	HLA-DRB6
chr6_32570472_32570779	rs743862	Intergenic	BTNL2	Intergenic	HLA-DRB6
chr6_32570472_32570779	rs3129882	intron (NM_019111, intron 1 of 4).6	HLA-DRA	Intergenic	HLA-DRB6
chr6_32570472_32570779	rs532098	Intergenic	HLA-DRB1	Intergenic	HLA-DRB6
chr6_32570472_32570779	rs9275224	Intergenic	HLA-DQB1	Intergenic	HLA-DRB6
chr6_32570472_32570779	rs2858332	Intergenic	HLA-DQA2	Intergenic	HLA-DRB6
chr6_32570472_32570779	rs3104402	Intergenic	HLA-DQA2	Intergenic	HLA-DRB6
chr6_32570472_32570779	rs3104405	Intergenic	HLA-DQA2	Intergenic	HLA-DRB6
chr6_32570472_32570779	rs9275601	Intergenic	HLA-DQA2	Intergenic	HLA-DRB6
chr6_32570472_32570779	rs9275602	Intergenic	HLA-DQA2	Intergenic	HLA-DRB6
chr6_32570472_32570779	rs7767167	Intergenic	HLA-DOB	Intergenic	HLA-DRB6
chr6_32570472_32570779	rs4713600	intron (NM_002800, intron 1 of 5).5	PSMB9	Intergenic	HLA-DRB6
chr6_32570472_32570779	rs151719	intron (NM_002118, intron 3 of 5).2	HLA-DMB	Intergenic	HLA-DRB6
chr6_32570472_32570779	rs3135029	promoter-TSS (NM_006120)	HLA-DMA	Intergenic	HLA-DRB6
chr6_32572906_32572966	rs6932542	Intergenic	BTNL2	Intergenic	HLA-DRB6
chr6_32572906_32572966	rs743862	Intergenic	BTNL2	Intergenic	HLA-DRB6
chr6_32572906_32572966	rs3129871	Intergenic	HLA-DRA	Intergenic	HLA-DRB6
chr6_32572906_32572966	rs3129882	intron (NM_019111, intron 1 of 4).6	HLA-DRA	Intergenic	HLA-DRB6
chr6_32572906_32572966	rs3129890	Intergenic	HLA-DRA	Intergenic	HLA-DRB6
chr6_32572906_32572966	rs532098	Intergenic	HLA-DRB1	Intergenic	HLA-DRB6
chr6_32572906_32572966	rs17842183	Intergenic	HLA-DQA1	Intergenic	HLA-DRB6
chr6_32572906_32572966	rs9275224	Intergenic	HLA-DQB1	Intergenic	HLA-DRB6
chr6_32572906_32572966	rs9275601	Intergenic	HLA-DQA2	Intergenic	HLA-DRB6
chr6_32572906_32572966	rs4713600	intron (NM_002800, intron 1 of 5).5	PSMB9	Intergenic	HLA-DRB6
chr6_32574091_32575342	rs6932542	Intergenic	BTNL2	Intergenic	HLA-DRB6
chr6_32574091_32575342	rs743862	Intergenic	BTNL2	Intergenic	HLA-DRB6
chr6_32574091_32575342	rs532098	Intergenic	HLA-DRB1	Intergenic	HLA-DRB6
chr6_32574091_32575342	rs17842183	Intergenic	HLA-DQA1	Intergenic	HLA-DRB6
chr6_32574091_32575342	rs9275224	Intergenic	HLA-DQB1	Intergenic	HLA-DRB6
chr6_32574091_32575342	rs9275601	Intergenic	HLA-DQA2	Intergenic	HLA-DRB6
chr6_32574091_32575342	rs151719	intron (NM_002118, intron 3 of 5).2	HLA-DMB	Intergenic	HLA-DRB6
chr6_32577390_32578850	rs743862	Intergenic	BTNL2	TTS (NM_001243965)	HLA-DRB1
chr6_32577390_32578850	rs1383265	Intergenic	HLA-DQB2	TTS (NM_001243965)	HLA-DRB1
chr6_32580544_32581028	rs1150754	intron (NM_019105, intron 8 of 43)	TNXB	exon (NM_001243965, exon 6 of 8)	HLA-DRB1
chr6_32580544_32581028	rs436388	non-coding (NR_134949, exon 9 of 30).3	NOTCH4	exon (NM_001243965, exon 6 of 8)	HLA-DRB1
chr6_32580544_32581028	rs6932542	Intergenic	BTNL2	exon (NM_001243965, exon 6 of 8)	HLA-DRB1
chr6_32580544_32581028	rs743862	Intergenic	BTNL2	exon (NM_001243965, exon 6 of 8)	HLA-DRB1
chr6_32580544_32581028	rs3129882	intron (NM_019111, intron 1 of 4).6	HLA-DRA	exon (NM_001243965, exon 6 of 8)	HLA-DRB1
chr6_32580544_32581028	rs532098	Intergenic	HLA-DRB1	exon (NM_001243965, exon 6 of 8)	HLA-DRB1
chr6_32580544_32581028	rs3104405	Intergenic	HLA-DQA2	exon (NM_001243965, exon 6 of 8)	HLA-DRB1
chr6_32580544_32581028	rs9275601	Intergenic	HLA-DQA2	exon (NM_001243965, exon 6 of 8)	HLA-DRB1
chr6_32580544_32581028	rs9275602	Intergenic	HLA-DQA2	exon (NM_001243965, exon 6 of 8)	HLA-DRB1
chr6_32580544_32581028	rs4713600	intron (NM_002800, intron 1 of 5).5	PSMB9	exon (NM_001243965, exon 6 of 8)	HLA-DRB1
chr6_32580544_32581028	rs151719	intron (NM_002118, intron 3 of 5).2	HLA-DMB	exon (NM_001243965, exon 6 of 8)	HLA-DRB1
chr6_32581351_32581720	rs3134931	intron (NM_004557, intron 2 of 29).2	NOTCH4	intron (NM_002124, intron 3 of 5)	HLA-DRB1
chr6_32581351_32581720	rs411326	Intergenic	TSBP1-AS1	intron (NM_002124, intron 3 of 5)	HLA-DRB1
chr6_32581351_32581720	rs6932542	Intergenic	BTNL2	intron (NM_002124, intron 3 of 5)	HLA-DRB1
chr6_32581351_32581720	rs532098	Intergenic	HLA-DRB1	intron (NM_002124, intron 3 of 5)	HLA-DRB1
chr6_32581351_32581720	rs2858332	Intergenic	HLA-DQA2	intron (NM_002124, intron 3 of 5)	HLA-DRB1
chr6_32581351_32581720	rs3104402	Intergenic	HLA-DQA2	intron (NM_002124, intron 3 of 5)	HLA-DRB1
chr6_32581351_32581720	rs3104405	Intergenic	HLA-DQA2	intron (NM_002124, intron 3 of 5)	HLA-DRB1
chr6_32581351_32581720	rs7767167	Intergenic	HLA-DOB	intron (NM_002124, intron 3 of 5)	HLA-DRB1
chr6_32581854_32582159	rs6932542	Intergenic	BTNL2	intron (NM_002124, intron 2 of 5)	HLA-DRB1
chr6_32581854_32582159	rs9275224	Intergenic	HLA-DQB1	intron (NM_002124, intron 2 of 5)	HLA-DRB1
chr6_32581854_32582159	rs2858332	Intergenic	HLA-DQA2	intron (NM_002124, intron 2 of 5)	HLA-DRB1
chr6_32581854_32582159	rs9275601	Intergenic	HLA-DQA2	intron (NM_002124, intron 2 of 5)	HLA-DRB1
chr6_32582710_32583620	rs3134954	intron (NM_019105, intron 1 of 43)	TNXB	intron (NM_002124, intron 2 of 5)	HLA-DRB1
chr6_32582710_32583620	rs411326	Intergenic	TSBP1-AS1	intron (NM_002124, intron 2 of 5)	HLA-DRB1
chr6_32582710_32583620	rs6932542	Intergenic	BTNL2	intron (NM_002124, intron 2 of 5)	HLA-DRB1
chr6_32582710_32583620	rs743862	Intergenic	BTNL2	intron (NM_002124, intron 2 of 5)	HLA-DRB1
chr6_32582710_32583620	rs3129882	intron (NM_019111, intron 1 of 4).6	HLA-DRA	intron (NM_002124, intron 2 of 5)	HLA-DRB1
chr6_32582710_32583620	rs532098	Intergenic	HLA-DRB1	intron (NM_002124, intron 2 of 5)	HLA-DRB1
chr6_32582710_32583620	rs17842183	Intergenic	HLA-DQA1	intron (NM_002124, intron 2 of 5)	HLA-DRB1
chr6_32582710_32583620	rs2157051	Intergenic	HLA-DQB1	intron (NM_002124, intron 2 of 5)	HLA-DRB1
chr6_32582710_32583620	rs9275224	Intergenic	HLA-DQB1	intron (NM_002124, intron 2 of 5)	HLA-DRB1
chr6_32582710_32583620	rs3104402	Intergenic	HLA-DQA2	intron (NM_002124, intron 2 of 5)	HLA-DRB1
chr6_32582710_32583620	rs3104405	Intergenic	HLA-DQA2	intron (NM_002124, intron 2 of 5)	HLA-DRB1
chr6_32582710_32583620	rs9275601	Intergenic	HLA-DQA2	intron (NM_002124, intron 2 of 5)	HLA-DRB1
chr6_32582710_32583620	rs7767167	Intergenic	HLA-DOB	intron (NM_002124, intron 2 of 5)	HLA-DRB1
chr6_32582710_32583620	rs151719	intron (NM_002118, intron 3 of 5).2	HLA-DMB	intron (NM_002124, intron 2 of 5)	HLA-DRB1
chr6_32583759_32583973	rs3134954	intron (NM_019105, intron 1 of 43)	TNXB	intron (NM_002124, intron 2 of 5)	HLA-DRB1
chr6_32583759_32583973	rs436388	non-coding (NR_134949, exon 9 of 30).3	NOTCH4	intron (NM_002124, intron 2 of 5)	HLA-DRB1
chr6_32583759_32583973	rs411326	Intergenic	TSBP1-AS1	intron (NM_002124, intron 2 of 5)	HLA-DRB1
chr6_32583759_32583973	rs6932542	Intergenic	BTNL2	intron (NM_002124, intron 2 of 5)	HLA-DRB1
chr6_32583759_32583973	rs743862	Intergenic	BTNL2	intron (NM_002124, intron 2 of 5)	HLA-DRB1
chr6_32583759_32583973	rs3129882	intron (NM_019111, intron 1 of 4).6	HLA-DRA	intron (NM_002124, intron 2 of 5)	HLA-DRB1
chr6_32583759_32583973	rs532098	Intergenic	HLA-DRB1	intron (NM_002124, intron 2 of 5)	HLA-DRB1
chr6_32583759_32583973	rs17842183	Intergenic	HLA-DQA1	intron (NM_002124, intron 2 of 5)	HLA-DRB1
chr6_32583759_32583973	rs2157051	Intergenic	HLA-DQB1	intron (NM_002124, intron 2 of 5)	HLA-DRB1
chr6_32583759_32583973	rs9275224	Intergenic	HLA-DQB1	intron (NM_002124, intron 2 of 5)	HLA-DRB1
chr6_32583759_32583973	rs3104402	Intergenic	HLA-DQA2	intron (NM_002124, intron 2 of 5)	HLA-DRB1
chr6_32583759_32583973	rs3104405	Intergenic	HLA-DQA2	intron (NM_002124, intron 2 of 5)	HLA-DRB1
chr6_32583759_32583973	rs9275601	Intergenic	HLA-DQA2	intron (NM_002124, intron 2 of 5)	HLA-DRB1
chr6_32583759_32583973	rs7767167	Intergenic	HLA-DOB	intron (NM_002124, intron 2 of 5)	HLA-DRB1
chr6_32583759_32583973	rs151719	intron (NM_002118, intron 3 of 5).2	HLA-DMB	intron (NM_002124, intron 2 of 5)	HLA-DRB1
chr6_32583759_32583973	rs2284191	intron (NM_002119, intron 1 of 4).7	HLA-DOA	intron (NM_002124, intron 2 of 5)	HLA-DRB1
chr6_32584090_32584819	rs204993	intron (NM_002586, intron 4 of 8)	PBX2	intron (NM_002124, intron 1 of 5)	HLA-DRB1
chr6_32584090_32584819	rs411326	Intergenic	TSBP1-AS1	intron (NM_002124, intron 1 of 5)	HLA-DRB1
chr6_32584090_32584819	rs6932542	Intergenic	BTNL2	intron (NM_002124, intron 1 of 5)	HLA-DRB1
chr6_32584090_32584819	rs743862	Intergenic	BTNL2	intron (NM_002124, intron 1 of 5)	HLA-DRB1
chr6_32584090_32584819	rs3129882	intron (NM_019111, intron 1 of 4).6	HLA-DRA	intron (NM_002124, intron 1 of 5)	HLA-DRB1
chr6_32584090_32584819	rs532098	Intergenic	HLA-DRB1	intron (NM_002124, intron 1 of 5)	HLA-DRB1
chr6_32584090_32584819	rs17842183	Intergenic	HLA-DQA1	intron (NM_002124, intron 1 of 5)	HLA-DRB1
chr6_32584090_32584819	rs2157051	Intergenic	HLA-DQB1	intron (NM_002124, intron 1 of 5)	HLA-DRB1
chr6_32584090_32584819	rs9275224	Intergenic	HLA-DQB1	intron (NM_002124, intron 1 of 5)	HLA-DRB1
chr6_32584090_32584819	rs3104402	Intergenic	HLA-DQA2	intron (NM_002124, intron 1 of 5)	HLA-DRB1
chr6_32584090_32584819	rs3104405	Intergenic	HLA-DQA2	intron (NM_002124, intron 1 of 5)	HLA-DRB1
chr6_32584090_32584819	rs7767167	Intergenic	HLA-DOB	intron (NM_002124, intron 1 of 5)	HLA-DRB1
chr6_32584090_32584819	rs151719	intron (NM_002118, intron 3 of 5).2	HLA-DMB	intron (NM_002124, intron 1 of 5)	HLA-DRB1
chr6_32585365_32586609	rs411326	Intergenic	TSBP1-AS1	intron (NM_002124, intron 1 of 5)	HLA-DRB1
chr6_32585365_32586609	rs6932542	Intergenic	BTNL2	intron (NM_002124, intron 1 of 5)	HLA-DRB1
chr6_32585365_32586609	rs3129882	intron (NM_019111, intron 1 of 4).6	HLA-DRA	intron (NM_002124, intron 1 of 5)	HLA-DRB1
chr6_32585365_32586609	rs532098	Intergenic	HLA-DRB1	intron (NM_002124, intron 1 of 5)	HLA-DRB1
chr6_32585365_32586609	rs2157051	Intergenic	HLA-DQB1	intron (NM_002124, intron 1 of 5)	HLA-DRB1
chr6_32585365_32586609	rs9275224	Intergenic	HLA-DQB1	intron (NM_002124, intron 1 of 5)	HLA-DRB1
chr6_32585365_32586609	rs3104402	Intergenic	HLA-DQA2	intron (NM_002124, intron 1 of 5)	HLA-DRB1
chr6_32585365_32586609	rs3104405	Intergenic	HLA-DQA2	intron (NM_002124, intron 1 of 5)	HLA-DRB1
chr6_32585365_32586609	rs9275601	Intergenic	HLA-DQA2	intron (NM_002124, intron 1 of 5)	HLA-DRB1
chr6_32585365_32586609	rs9275602	Intergenic	HLA-DQA2	intron (NM_002124, intron 1 of 5)	HLA-DRB1
chr6_32585365_32586609	rs7767167	Intergenic	HLA-DOB	intron (NM_002124, intron 1 of 5)	HLA-DRB1
chr6_32585365_32586609	rs151719	intron (NM_002118, intron 3 of 5).2	HLA-DMB	intron (NM_002124, intron 1 of 5)	HLA-DRB1
chr6_32587104_32587856	rs204993	intron (NM_002586, intron 4 of 8)	PBX2	intron (NM_002124, intron 1 of 5)	HLA-DRB1
chr6_32587104_32587856	rs743862	Intergenic	BTNL2	intron (NM_002124, intron 1 of 5)	HLA-DRB1
chr6_32587104_32587856	rs3129882	intron (NM_019111, intron 1 of 4).6	HLA-DRA	intron (NM_002124, intron 1 of 5)	HLA-DRB1
chr6_32587104_32587856	rs3129890	Intergenic	HLA-DRA	intron (NM_002124, intron 1 of 5)	HLA-DRB1
chr6_32587104_32587856	rs532098	Intergenic	HLA-DRB1	intron (NM_002124, intron 1 of 5)	HLA-DRB1
chr6_32587104_32587856	rs9275224	Intergenic	HLA-DQB1	intron (NM_002124, intron 1 of 5)	HLA-DRB1
chr6_32587104_32587856	rs3104402	Intergenic	HLA-DQA2	intron (NM_002124, intron 1 of 5)	HLA-DRB1
chr6_32587104_32587856	rs9275601	Intergenic	HLA-DQA2	intron (NM_002124, intron 1 of 5)	HLA-DRB1
chr6_32587104_32587856	rs151719	intron (NM_002118, intron 3 of 5).2	HLA-DMB	intron (NM_002124, intron 1 of 5)	HLA-DRB1
chr6_32599571_32600120	rs9275602	Intergenic	HLA-DQA2	Intergenic	HLA-DRB1
chr6_32599571_32600120	rs4713600	intron (NM_002800, intron 1 of 5).5	PSMB9	Intergenic	HLA-DRB1
chr6_32610979_32611300	rs204993	intron (NM_002586, intron 4 of 8)	PBX2	Intergenic	HLA-DRB1
chr6_32610979_32611300	rs6932542	Intergenic	BTNL2	Intergenic	HLA-DRB1
chr6_32610979_32611300	rs743862	Intergenic	BTNL2	Intergenic	HLA-DRB1
chr6_32610979_32611300	rs3104402	Intergenic	HLA-DQA2	Intergenic	HLA-DRB1
chr6_32610979_32611300	rs9275602	Intergenic	HLA-DQA2	Intergenic	HLA-DRB1
chr6_32610979_32611300	rs4713600	intron (NM_002800, intron 1 of 5).5	PSMB9	Intergenic	HLA-DRB1
chr6_32619054_32619615	rs3129890	Intergenic	HLA-DRA	Intergenic	HLA-DQA1
chr6_32619054_32619615	rs3104405	Intergenic	HLA-DQA2	Intergenic	HLA-DQA1
chr6_32619054_32619615	rs9275601	Intergenic	HLA-DQA2	Intergenic	HLA-DQA1
chr6_32621746_32622065	rs204993	intron (NM_002586, intron 4 of 8)	PBX2	Intergenic	HLA-DQA1
chr6_32621746_32622065	rs743862	Intergenic	BTNL2	Intergenic	HLA-DQA1
chr6_32621746_32622065	rs532098	Intergenic	HLA-DRB1	Intergenic	HLA-DQA1
chr6_32621746_32622065	rs3104405	Intergenic	HLA-DQA2	Intergenic	HLA-DQA1
chr6_32621746_32622065	rs9275601	Intergenic	HLA-DQA2	Intergenic	HLA-DQA1
chr6_32621746_32622065	rs4713600	intron (NM_002800, intron 1 of 5).5	PSMB9	Intergenic	HLA-DQA1
chr6_32624568_32625421	rs204993	intron (NM_002586, intron 4 of 8)	PBX2	Intergenic	HLA-DQA1
chr6_32624568_32625421	rs743862	Intergenic	BTNL2	Intergenic	HLA-DQA1
chr6_32624568_32625421	rs532098	Intergenic	HLA-DRB1	Intergenic	HLA-DQA1
chr6_32624568_32625421	rs17842183	Intergenic	HLA-DQA1	Intergenic	HLA-DQA1
chr6_32624568_32625421	rs9275224	Intergenic	HLA-DQB1	Intergenic	HLA-DQA1
chr6_32624568_32625421	rs3104405	Intergenic	HLA-DQA2	Intergenic	HLA-DQA1
chr6_32624568_32625421	rs9275601	Intergenic	HLA-DQA2	Intergenic	HLA-DQA1
chr6_32624568_32625421	rs7767167	Intergenic	HLA-DOB	Intergenic	HLA-DQA1
chr6_32624568_32625421	rs151719	intron (NM_002118, intron 3 of 5).2	HLA-DMB	Intergenic	HLA-DQA1
chr6_32624568_32625421	rs2284191	intron (NM_002119, intron 1 of 4).7	HLA-DOA	Intergenic	HLA-DQA1
chr6_32637748_32637990	rs204993	intron (NM_002586, intron 4 of 8)	PBX2	intron (NM_002122, intron 1 of 4)	HLA-DQA1
chr6_32637748_32637990	rs411326	Intergenic	TSBP1-AS1	intron (NM_002122, intron 1 of 4)	HLA-DQA1
chr6_32637748_32637990	rs6932542	Intergenic	BTNL2	intron (NM_002122, intron 1 of 4)	HLA-DQA1
chr6_32637748_32637990	rs743862	Intergenic	BTNL2	intron (NM_002122, intron 1 of 4)	HLA-DQA1
chr6_32637748_32637990	rs3129871	Intergenic	HLA-DRA	intron (NM_002122, intron 1 of 4)	HLA-DQA1
chr6_32637748_32637990	rs3129882	intron (NM_019111, intron 1 of 4).6	HLA-DRA	intron (NM_002122, intron 1 of 4)	HLA-DQA1
chr6_32637748_32637990	rs532098	Intergenic	HLA-DRB1	intron (NM_002122, intron 1 of 4)	HLA-DQA1
chr6_32637748_32637990	rs9275224	Intergenic	HLA-DQB1	intron (NM_002122, intron 1 of 4)	HLA-DQA1
chr6_32637748_32637990	rs2858332	Intergenic	HLA-DQA2	intron (NM_002122, intron 1 of 4)	HLA-DQA1
chr6_32637748_32637990	rs3104402	Intergenic	HLA-DQA2	intron (NM_002122, intron 1 of 4)	HLA-DQA1
chr6_32637748_32637990	rs3104405	Intergenic	HLA-DQA2	intron (NM_002122, intron 1 of 4)	HLA-DQA1
chr6_32637748_32637990	rs9275601	Intergenic	HLA-DQA2	intron (NM_002122, intron 1 of 4)	HLA-DQA1
chr6_32637748_32637990	rs7767167	Intergenic	HLA-DOB	intron (NM_002122, intron 1 of 4)	HLA-DQA1
chr6_32637748_32637990	rs151719	intron (NM_002118, intron 3 of 5).2	HLA-DMB	intron (NM_002122, intron 1 of 4)	HLA-DQA1
chr6_32662178_32662362	rs532098	Intergenic	HLA-DRB1	intron (NM_002123, intron 2 of 4)	HLA-DQB1-AS1
chr6_32662687_32663415	rs3129882	intron (NM_019111, intron 1 of 4).6	HLA-DRA	intron (NM_002123, intron 2 of 4)	HLA-DQB1-AS1
chr6_32706250_32706306	rs3134931	intron (NM_004557, intron 2 of 29).2	NOTCH4	Intergenic	HLA-DQA2
chr6_32706250_32706306	rs411326	Intergenic	TSBP1-AS1	Intergenic	HLA-DQA2
chr6_32706250_32706306	rs6932542	Intergenic	BTNL2	Intergenic	HLA-DQA2
chr6_32706250_32706306	rs743862	Intergenic	BTNL2	Intergenic	HLA-DQA2
chr6_32706250_32706306	rs3129871	Intergenic	HLA-DRA	Intergenic	HLA-DQA2
chr6_32706250_32706306	rs3129882	intron (NM_019111, intron 1 of 4).6	HLA-DRA	Intergenic	HLA-DQA2
chr6_32706250_32706306	rs9275224	Intergenic	HLA-DQB1	Intergenic	HLA-DQA2
chr6_32706250_32706306	rs3104402	Intergenic	HLA-DQA2	Intergenic	HLA-DQA2
chr6_32706250_32706306	rs7767167	Intergenic	HLA-DOB	Intergenic	HLA-DQA2
chr6_32706250_32706306	rs151719	intron (NM_002118, intron 3 of 5).2	HLA-DMB	Intergenic	HLA-DQA2
