# Supplementary material for: High-resolution DNA methylation screening of the major histocompatibility complex in multiple sclerosis
Source: Frontiers journal article supplement (doi:10.3389/fneur.2023.1326738), 2023-12-08
Supplement: Table_6.XLSX [file Table_6.XLSX]

## Sheet: cis_mqtl_CIT_FDR0.05_SNP_MHC_SN
cis-mQTL	cis-mQTL Locus	MS GWAS effects	MS GWAS effect locus	R2
rs2284178	HCP5	rs9266629	intergenic (ZDHHC20P2/FGFR3P1)	0.115
rs10947213	MICB	rs3093982	MCCD1	0.232
rs3134954	TNXB	rs3093982	MCCD1	0.372
rs436388	NOTCH4	rs3093982	MCCD1	0.119
rs3104402	Intergenic (HLA-DQA2)	rs3093982	MCCD1	0.132
rs7767167	Intergenic (HLA-DOB)	rs3093982	MCCD1	0.137
rs2156875	Intergenic (MIR6891)	rs2523500	NFKBIL1	0.119
rs10947213	MICB	rs2523500	NFKBIL1	0.335
rs6929796	NFKBIL1	rs2523500	NFKBIL1	0.116
rs3134954	TNXB	rs2523500	NFKBIL1	0.123
rs1150754	TNXB	rs17493811	AGPAT1	0.122
rs3134954	TNXB	rs9271366	intergenic (DRB1/DQA1)	0.605
rs436388	NOTCH4	rs9271366	intergenic (DRB1/DQA1)	0.148
rs1265759	TSBP1	rs9271366	intergenic (DRB1/DQA1)	0.125
rs6932542	Intergenic (BTNL2)	rs9271366	intergenic (DRB1/DQA1)	0.165
rs3129871	Intergenic (HLA-DRA)	rs9271366	intergenic (DRB1/DQA1)	0.237
rs3129882	HLA-DRA	rs9271366	intergenic (DRB1/DQA1)	0.168
rs532098	Intergenic (HLA-DRB1)	rs9271366	intergenic (DRB1/DQA1)	0.122
rs2157051	Intergenic (HLA-DQB1)	rs9271366	intergenic (DRB1/DQA1)	0.218
rs9275224	Intergenic (HLA-DQB1)	rs9271366	intergenic (DRB1/DQA1)	0.144
rs2858332	Intergenic (HLA-DQA2)	rs9271366	intergenic (DRB1/DQA1)	0.115
rs3104402	Intergenic (HLA-DQA2)	rs9271366	intergenic (DRB1/DQA1)	0.397
rs3104405	Intergenic (HLA-DQA2)	rs9271366	intergenic (DRB1/DQA1)	0.12
rs7767167	Intergenic (HLA-DOB)	rs9271366	intergenic (DRB1/DQA1)	0.474
rs151719	HLA-DMB	rs9271366	intergenic (DRB1/DQA1)	0.101
rs3135029	HLA-DMA	rs9271366	intergenic (DRB1/DQA1)	0.147
rs411326	Intergenic (TSBP1-AS1)	rs10093	DQA1	0.102
rs9296015	Intergenic (TSBP1-AS1)	rs10093	DQA1	0.134
rs6932542	Intergenic (BTNL2)	rs10093	DQA1	0.398
rs3129882	HLA-DRA	rs10093	DQA1	0.213
rs3129890	Intergenic (HLA-DRA)	rs10093	DQA1	0.211
rs2858332	Intergenic (HLA-DQA2)	rs10093	DQA1	0.289
rs17842183	Intergenic (HLA-DQA1)	AA DQ_1 position 130 S	DQA1	0.126
rs2157051	Intergenic (HLA-DQB1)	AA DQ_1 position 130 S	DQA1	0.105
rs2284191	HLA-DOA	rs11751659	DPB2	0.167
